# Supplementary material
Source: publisher figshare collection journal article supplement (https://gsapubs.figshare.com/articles/dataset/_/12746846)
Supplement: Supplementary file 1 [file 1]

Yue Qi, Chris J. Hawkesworth, Qiang Wang, Derek A. Wyman, Zheng-Xiang Li, Han Dong, Tao Ma, Fukun Chen, Wan-Long Hu, and Xiu-Zheng Zhang, 2020, Syn-collisional magmatic record of Indian steep subduction by 50 Ma: GSA Bulletin, <https://doi.org/10.1130/B35498.1>.

## Supplemental Material

**Text S1.** Analytical methods including Zircon U-Pb dating and Hf isotope and whole rock geochemistry.

**Figure S1.** The 1:5000 scale geological cross-section from A to A'. Cross section locations are shown on the Fig. 1B.

**Figure S2.** SiO<sub>2</sub> and major and trace element diagrams of the Lopu Range batholith.

**Figure S3.** Large scale evolution if the continental collision and subduction.

**Table S1.** Zircon U-Pb isotopic data of the Lopu Range batholith.

**Table S2.** Major (wt%) and trace (ppm) element contents of the Lopu Range batholith.

**Text S2.** References cited in Data 1 and 3.

**Data 1.** Zircon Hf isotopic ratios of Lopu Range batholith and igneous rocks.

**Data 2.** Samples in Fig. 5B.

**Data 3.** Sr and Nd isotopic composition of the Lopu Range batholith.

# [1] Text S1 Analytical methods

## ZIRCON U-Pb DATING AND HF ISOTOPE

Zircons were separated from fresh samples using conventional heavy liquid and magnetic techniques and then hand-picked under a binocular microscope. Zircon grains were casted in the epoxy mount and polished to about half their thickness for analysis. Cathodoluminescence (CL) images of zircons were conducted at the State Key Laboratory of Isotope Geochemistry, Guangzhou Institute of Geochemistry, Chinese Academy of Sciences (SKLaBIG GIG CAS).

Zircon U-Pb dating was performed using LA-ICP-MS at the Institute of Geology and Geophysics, Chinese Academy of Sciences. Laser ablation was accomplished using a Geolas-193 laser-ablation system equipped with a 193 nm ArFexcimer laser and connected to an ELAN6100 DRC ICP-MS. The analyses were conducted with a spot diameter of 44  $\mu\text{m}$  with a typical ablation time of  $\sim 30$  s for 200 cycles of each measurement, an 8 Hz repetition rate, and a laser power of 100mJ/pulse. A more detailed description of the analytical technique is provided by Xie et al. (2008).

Secondary ion mass spectrometry (SIMS) zircon U-Pb analyses were conducted using a CAMECAIMS-1280-HR system at the SKLaBIG GIG CAS. Analytical procedures is similar to that described by Li et al. (2009). The  $\text{O}_2^-$  primary ion beam with an intensity of  $\sim 10$  nA was accelerated at  $-13$  kV. The ellipsoidal spot is  $\sim 20 \mu\text{m} \times 30 \mu\text{m}$  in size. The aperture illumination mode (Kohler illumination) was used with a 200  $\mu\text{m}$  primary beam mass filter (PBMF) aperture to produce even sputtering over the entire analyzed area. Oxygen flooding was used to increase the  $\text{O}_2$  pressure to  $5 \times 10^{-6}$  Torr in the sample chamber, enhancing  $\text{Pb}^+$  sensitivity to a value of  $\sim 25$  cps/nA/ppm for zircon. This great enhancement of  $\text{Pb}^+$  sensitivity is crucial to improve precision of  $^{207}\text{Pb}/^{206}\text{Pb}$  zircon measurement. Positive secondary ions were extracted with a 10 kV potential. In the secondary ion beam optics, a  $60 \pm 5$  eV energy window was used, together with a mass resolution of  $\sim 5400$ . Rectangular lenses were activated in the secondary ion optics to increase the transmission at high mass resolution. A single electron multiplier was used in ion-counting mode to measure secondary ion beam intensities by the peak jumping sequence: 196 ( $^{90}\text{Zr}_2^{16}\text{O}$ , matrix reference), 200 ( $^{92}\text{Zr}_2^{16}\text{O}$ ), 200.5 (background), 203.81 ( $^{94}\text{Zr}_2^{16}\text{O}$ , for mass calibration), 203.97 (Pb), 206 (Pb), 207 (Pb), 208 (Pb), 209 ( $^{177}\text{Hf}^{16}\text{O}_2$ ), 238 (U), 248 ( $^{232}\text{Th}^{16}\text{O}$ ), 270 ( $^{238}\text{U}^{16}\text{O}_2$ ), and 270.1 (reference mass). The integration time, for these mass are 1.04, 0.56, 4.16, 0.56, 6.24, 4.16, 6.24, 2.08, 1.04, 2.08, 2.08, 2.08, and 0.24 s, respectively. Each measurement consisted of seven cycles, and the total analytical time per measurement was  $\sim 12$  min.

Calibration of Pb/U ratios is relative to the standard zircon Plesovice (337.13 Ma, Sláma et al., 2008), which was analyzed once every four unknowns, based on an observed linear relationship between  $\ln(^{206}\text{Pb}/^{238}\text{U})$  and  $\ln(^{238}\text{U}^{16}\text{O}_2/^{238}\text{U})$  (Whitehouse et al., 1997). A long-term uncertainty of 1.5% (1RSD) for  $^{206}\text{Pb}/^{238}\text{U}$  measurements of the standard zircons was propagated to the unknowns (Li et al., 2010), despite that the measured  $^{206}\text{Pb}/^{238}\text{U}$  error in a specific session is

generally around 1% (1 RSD) or less. U and Th concentrations of unknowns were also calibrated relative to the standard zircon Plesovice, with Th and U concentrations of 78 and 755 ppm, respectively (Sláma et al., 2008). Measured compositions were corrected for common Pb using non-radiogenic  $^{204}\text{Pb}$ . A secondary standard zircon Qinghu (Li et al., 2013) were analyzed as unknown to monitor the reliability of the whole procedure. Uncertainties on single analyses are reported at the  $1\sigma$  level; mean ages for pooled U-Pb analyses are quoted with a 95% confidence interval. Data reduction was carried out using the Isoplot/Ex 3 software (Ludwig, 2003).

In situ zircon Hf isotope measurements were subsequently carried out on U-Pb dated zircons using LA-MC-ICP-MS with a beam size of 60  $\mu\text{m}$  and laser pulse frequency of 8 Hz at the MC-ICPMS laboratory of SKLIG GIG CAS. Details of instrumental conditions and data acquisition were given in Wu et al., (2006).

## WHOLE ROCK GEOCHEMISTRY

Major element oxides of whole rock samples were determined in the Hubei Province Geological Experimental Testing Center. The accuracy of the XRF analyses is between 1 and 5%. Trace elements were analyzed by inductively coupled plasma mass spectrometry (ICP-MS), using a Perkin-Elmer Sciex ELAN 6000 instrument at SKLaBIG GIG CAS. Analytical procedures are the same as those described by Li et al., (2002). Repeated runs give 3% RSD (relative standard deviation) for most elements of reference materials analyzed by ICP-MS.

Separation and purification of the Sr-Nd isotope were performed at the Key Laboratory of Crust-Mantle Materials and Environments, University of Science and Technology of China (USTC), Hefei. The digested samples were evaporated at 130  $^{\circ}\text{C}$ , and subsequently evaporated at 150  $^{\circ}\text{C}$  and redissolved in 6 N HCl twice to remove fluorides. In a final step, the samples were redissolved in 1 ml of 3N HCl and centrifuged. Sr and rare-earth elements were isolated on quartz columns by conventional ion exchange chromatography with a 5 ml resin bed of Bio Rad AG 50W-X12, 200–400 mesh. Nd was separated from rare-earth elements on quartz columns using 1.7 ml Teflon powder coated with HDEHP, di(2-ethylhexyl)orthophosphoric acid, as cation exchange medium. A more detailed description is provided by Chen et al. (2000).

Sr and Nd isotopic ratios of selected samples were determined using a Micromass Isoprobe multi-collector mass spectrometer (MC-ICP-MS) at SKLaBIG GIG-CAS. Analytical procedures are similar to those described in Li et al., (2004). Measured  $^{87}\text{Sr}/^{86}\text{Sr}$  and  $^{143}\text{Nd}/^{144}\text{Nd}$  ratios were normalized to  $^{86}\text{Sr}/^{88}\text{Sr} = 0.1194$  and  $^{146}\text{Nd}/^{144}\text{Nd} = 0.7219$ , respectively. Analyses of NBS-SRM 987 and the Shin Etsu JNdi-1 standards during this study yielded an average values of  $^{87}\text{Sr}/^{86}\text{Sr} = 0.710253 \pm 10$  ( $n = 10$ ) and  $^{143}\text{Nd}/^{144}\text{Nd} = 0.512109 \pm 3$  ( $n = 6$ ).

## REFERENCES CITED

- Chen, F., Hegner, E., and Todt, W., 2000, Zircon ages and Nd isotopic and chemical compositions of orthogneisses from the Black Forest, Germany: evidence for a Cambrian magmatic arc: *International Journal of Earth Sciences*, v. 88, p. 791–802, <https://doi.org/10.1007/s005310050306>.
- Li, X.H., Liu, Y., Li, Q.L., Guo, C.H., and Chamberlain, K.R., 2009, Precise determination of Phanerozoic zircon Pb/Pb age by multicollector SIMS without external standardization: *Geochemistry Geophysics Geosystems*, v. 10, Q04010.
- Li, X.H., Long, W.G., Li, Q.L., Liu, Y., Zheng, Y.F., Yang, Y.H., Chamberlain, K.R., Wan, D.F., Guo, C.H., Wang, X.C., and Tao, H., 2010, Penglai Zircon Megacrysts: A Potential New Working Reference Material for Microbeam Determination of Hf–O Isotopes and U–Pb Age: *Geostandards and Geoanalytical Research*, v. 34, p. 117–134, <https://doi.org/10.1111/j.1751-908X.2010.00036.x>.
- Li, X., Tang, G., Gong, B., Yang, Y., Hou, K., Hu, Z., Li, Q., Liu, Y., and Li, W., 2013, Qinghu zircon: A working reference for microbeam analysis of U–Pb age and Hf and O isotopes: *Chinese Science Bulletin*, v. 58, p. 4647–4654, <https://doi.org/10.1007/s11434-013-5932-x>.
- Li, X.H., Liu, D.Y., Sun, M., Li, W.X., Liang, X.R., and Liu, Y., 2004, Precise Sm–Nd and U–Pb isotopic dating of the supergiant Shizhuyuan polymetallic deposit and its host granite, SE China: *Geological Magazine*, v. 141, p. 225–231, <https://doi.org/10.1017/S0016756803008823>.
- Li, X.H., Zhou, H.W., Chung, S.L., Lo, C.H., Wei, G.J., Liu, Y., and Lee, C.Y., 2002, Geochemical and Sr–Nd isotopic characteristics of late paleogene ultrapotassic magmatism in southeastern Tibet: *International Geology Review*, v. 44, p. 559–574, <https://doi.org/10.2747/0020-6814.44.6.559>.
- Ludwig, K.R., 2003, User's Manual for Isoplot 3.00: A Geochronological Toolkit for Microsoft Excel: Berkeley California.
- Sláma, J., Košler, J., Condon, D.J., Crowley, J.L., Gerdes, A., Hanchar, J.M., Horstwood, M.S.A., Morris, G.A., Nasdala, L., Norberg, N., Schaltegger, U., Schoene, B., Tubrett, M.N., and Whitehouse, M.J., 2008, Plešovice zircon — A new natural reference material for U–Pb and Hf isotopic microanalysis: *Chemical Geology*, v. 249, p. 1–35, <https://doi.org/10.1016/j.chemgeo.2007.11.005>.
- Whitehouse, M.J., Claesson, S., Sunde, T., and Vestin, J., 1997, Ion microprobe U–Pb zircon geochronology and correlation of Archaean gneisses from the Lewisian Complex of Gruinard Bay, northwestern Scotland: *Geochimica et Cosmochimica Acta*, v. 61, p. 4429–4438, [https://doi.org/10.1016/S0016-7037\(97\)00251-2](https://doi.org/10.1016/S0016-7037(97)00251-2).
- Wu, F.Y., Yang, Y.H., Xie, L.W., Yang, J.H., and Xu, P., 2006, Hf isotopic compositions of the standard zircons and baddeleyites used in U–Pb geochronology: *Chemical Geology*, v. 234, p. 105–126, <https://doi.org/10.1016/j.chemgeo.2006.05.003>.
- Xie, L.W., Zhang, Y.B., Zhang, H.H., Sun, J.F., and Wu, F.Y., 2008, In situ simultaneous determination of trace elements, U–Pb and Lu–Hf isotopes in zircon and baddeleyite: *Chinese Science Bulletin*, v. 53, p. 1565–1573.

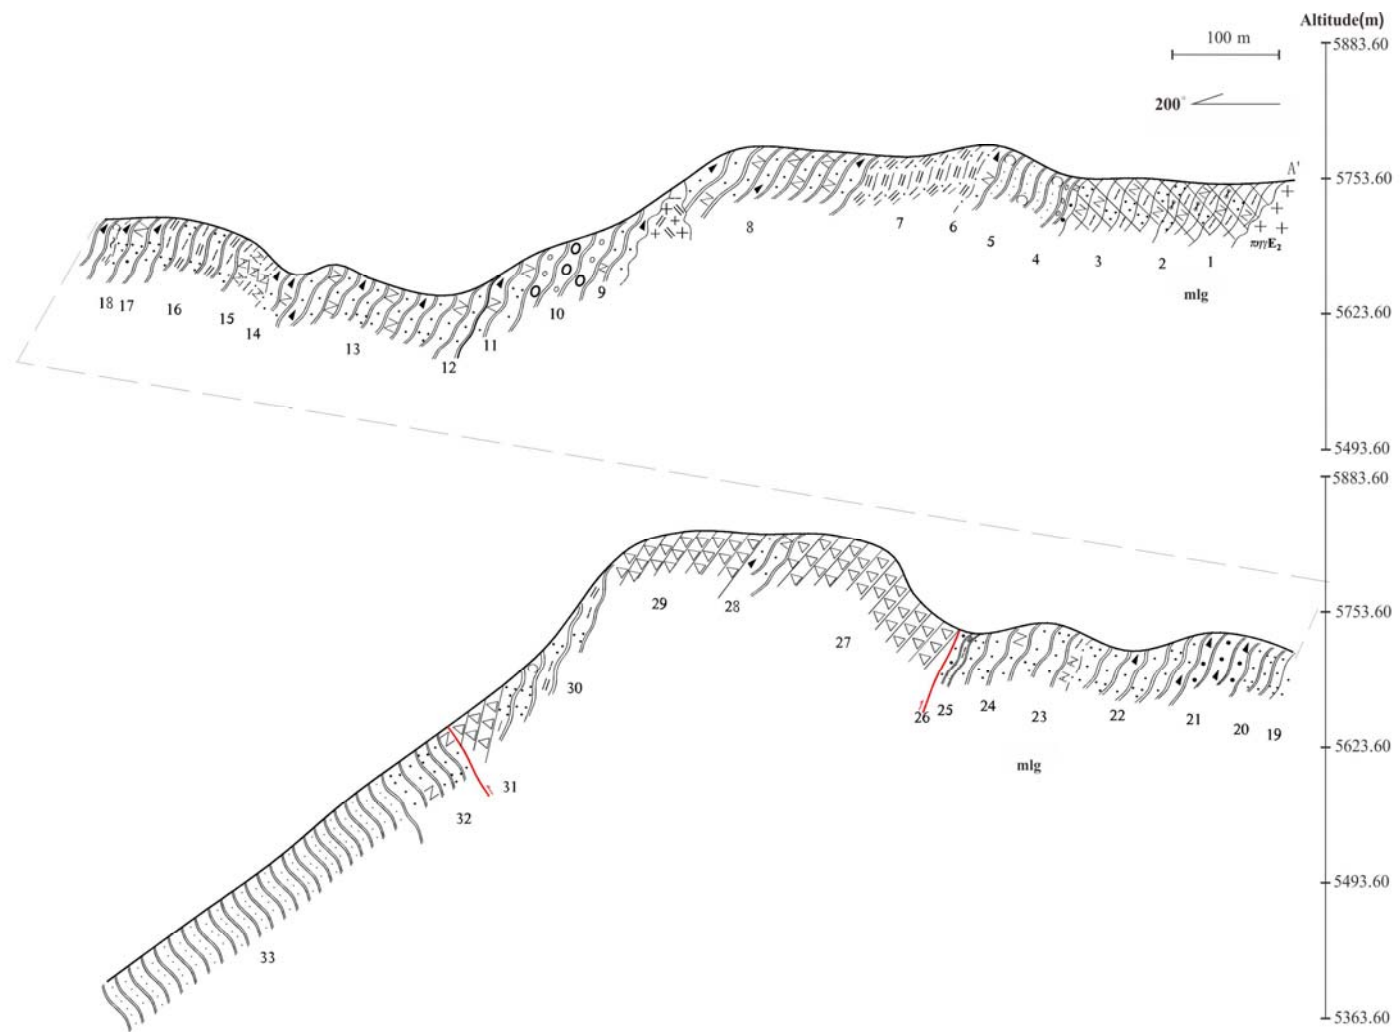

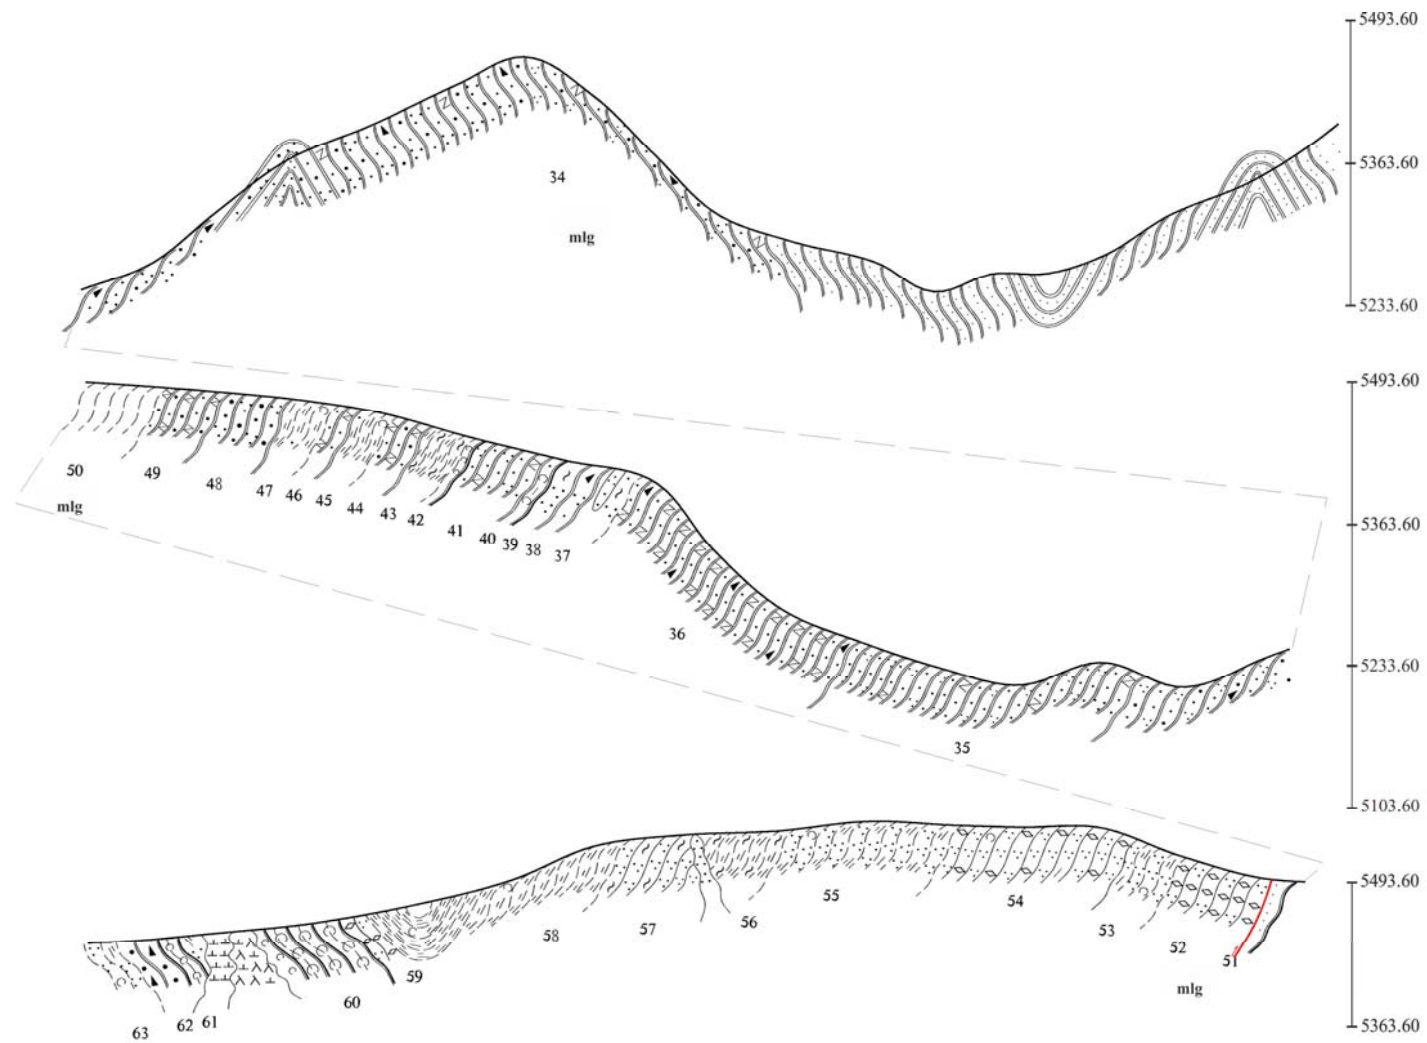

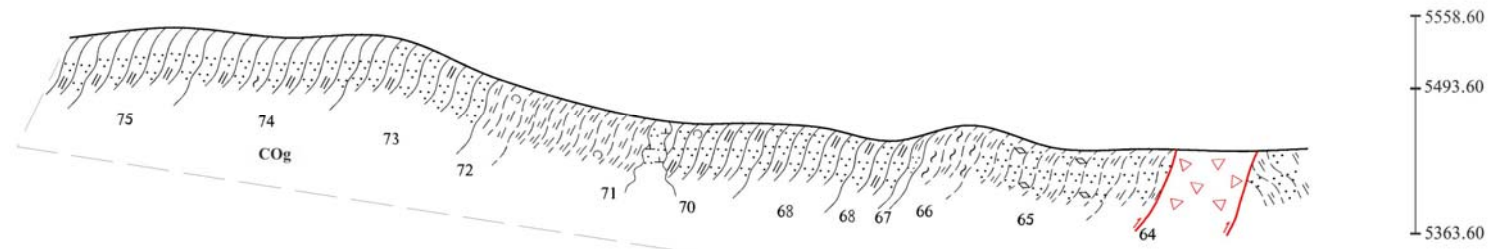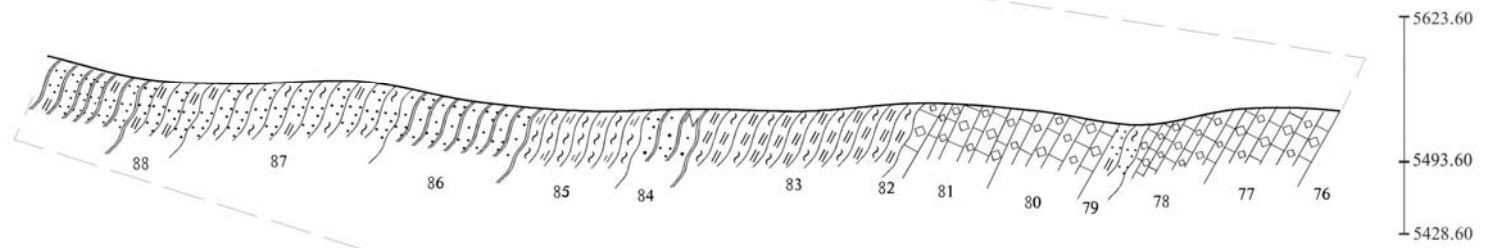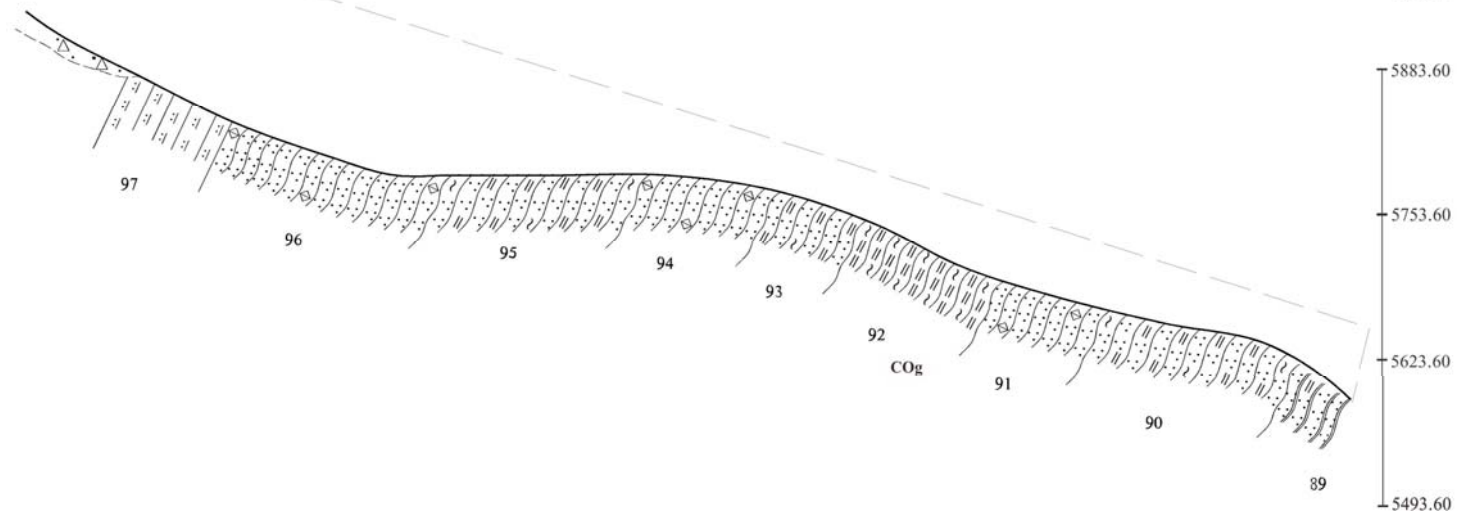

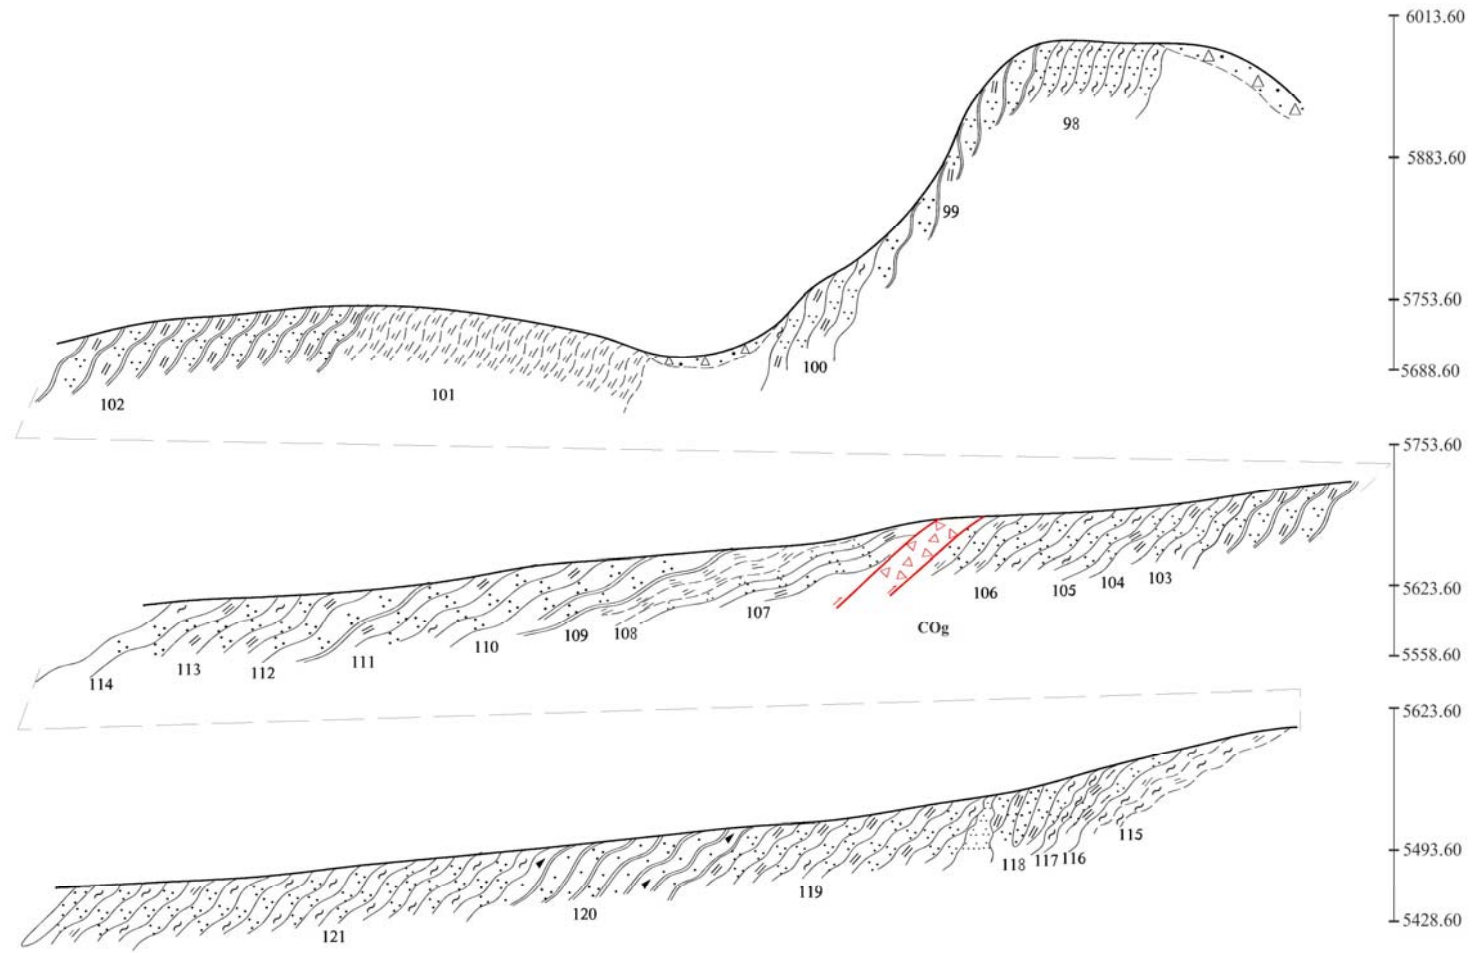



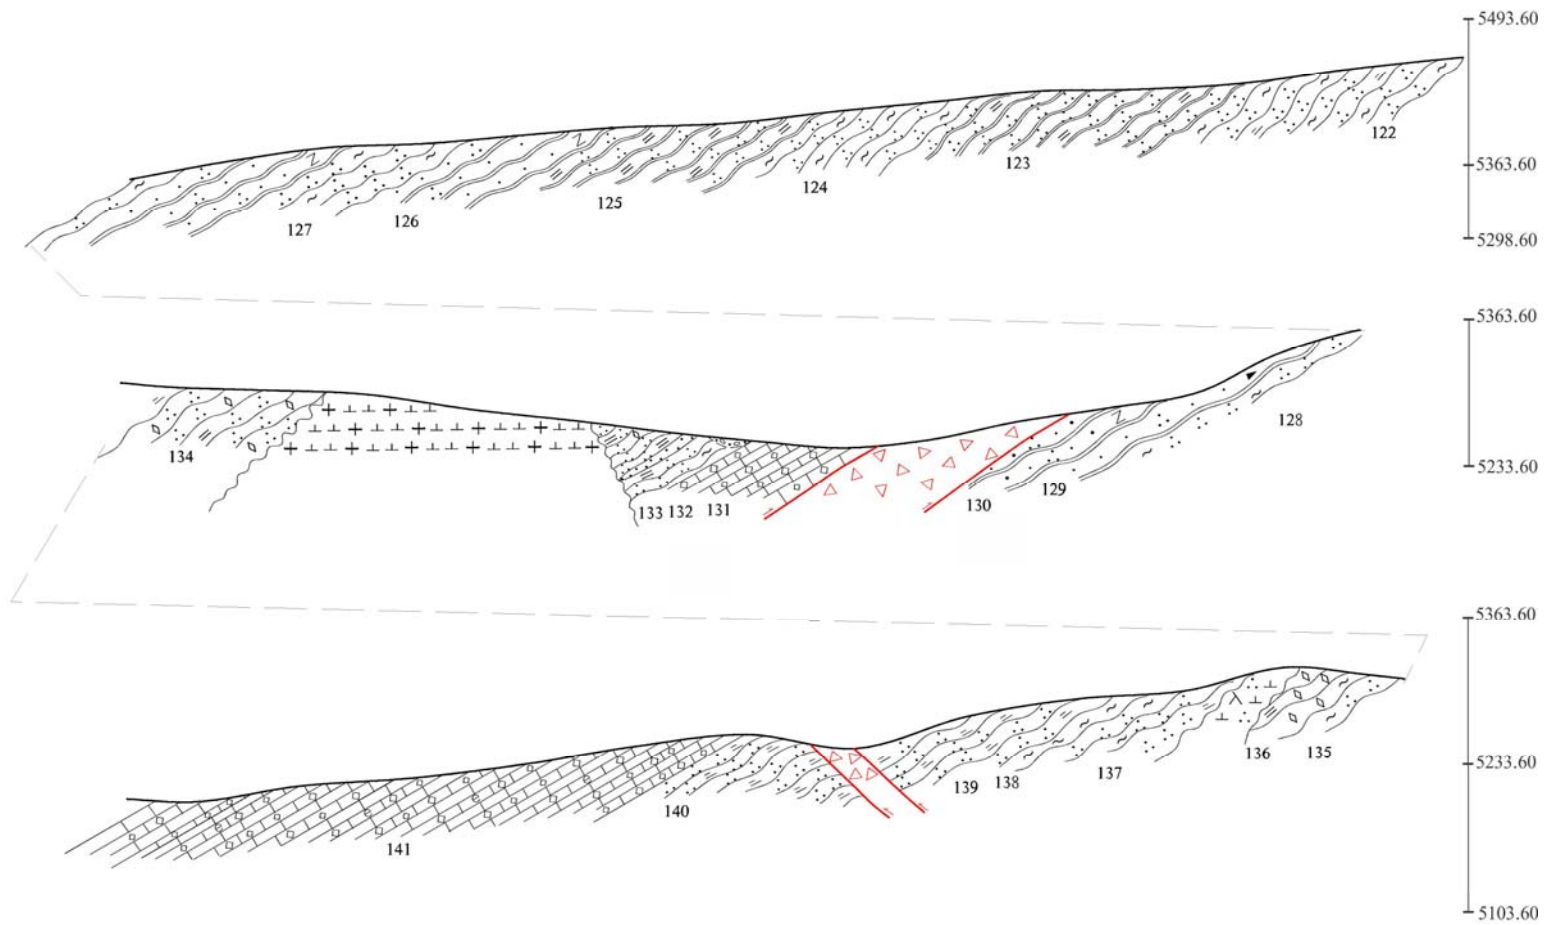

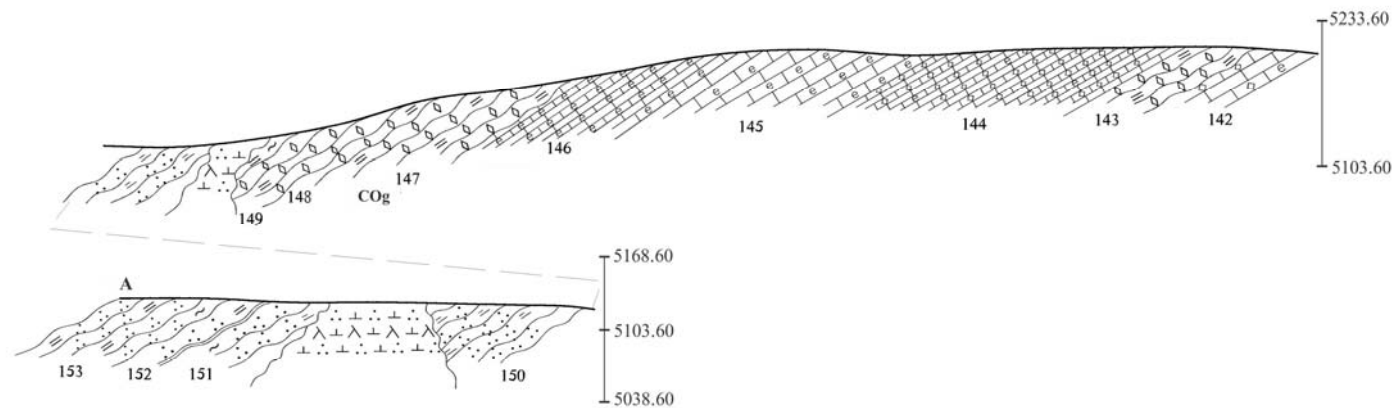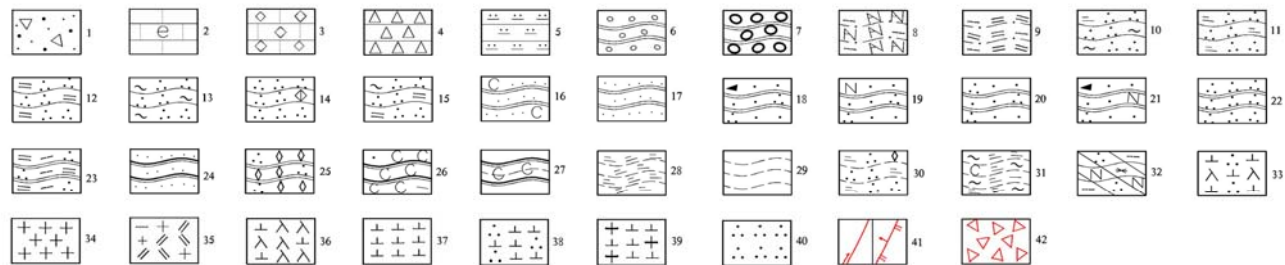

Figure S1. The 1:5000 scale geological cross-section from A to A'. Cross section locations are shown on the Fig. 1b. 1 to 153 is the layer number. Legend: 1: moraine deposit, 2: bioclastic limestone, 3: limestone, 4: volcanic breccia, 5: silicalite, 6: fine-metaconglomerate, 7: coarse-metaconglomerate, 8: biotite plagioclase leptynite, 9: biotite monzo-leptynite, 10: sericite-chlorite-quartz schist, 11: sericite-quartz schist, 12: muscovite-quartz schists, 13: chlorite-quartz schist, 14: quartz schist, 15: chlorite-muscovite-quartz schist, 16: carbon meta-siltstone, 17: meta-siltstone, 18: meta-debris quartz sandstone, 19: meta-feldspar quartz sandstone, 20: meta-quartz sandstone, 21: meta-debris feldspar quartz sandstone, 22: quartzite, 23: two-mica quartzite, 24: aleuropelitic slate, 25: quartz-calcite, 26: argillaceous slate, 27: carbonaceous slate, 28: sericite-phyllite, 29: phyllite, 30: quartz-calcite-sericite-phyllite, 31: chlorite-sericite-phyllite, 32: actinolite-biotite hornstone, 33: quartz-diorite porphyry, 34: granite, 35: biotite monzonite, 36: diorite-porphyrite, 37: diorite, 38: quartz diorite, 39: granodiorite-porphyry, 40: quartz vein, 41: thrust fault, 42: fault breccia.

Figure S2 SiO<sub>2</sub> and major and trace element diagrams of the Lopu Range batholith

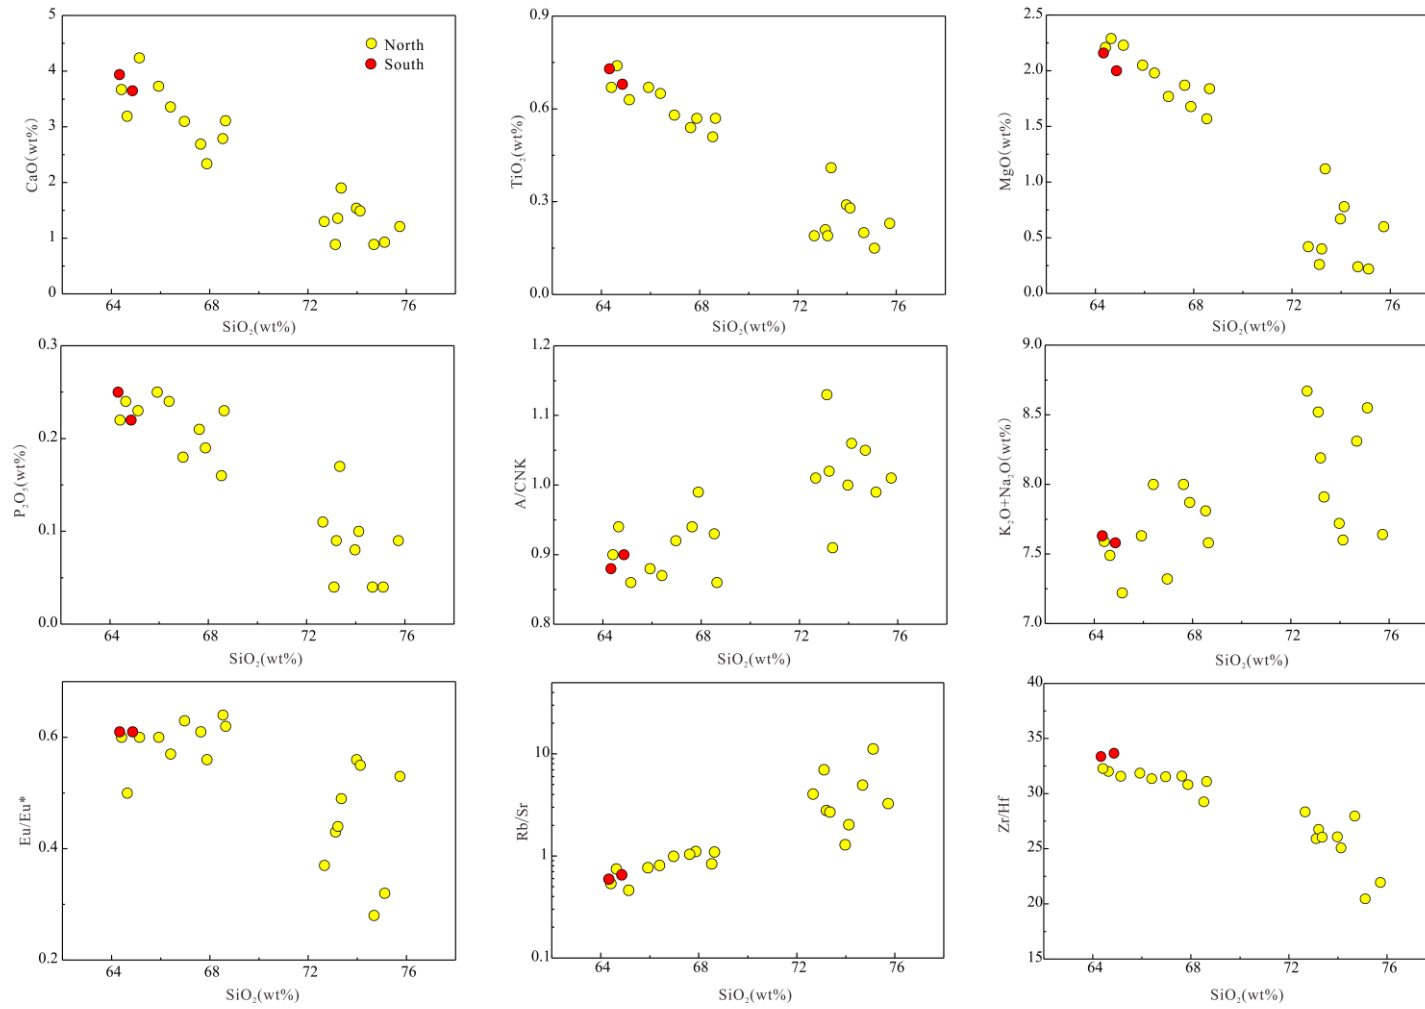

Table S1 Zircon U-Pb isotopic data of the Lopu Range batholith

| Sample spots                    | Th   | U    | Pb* | Ratios |                                      |         |                                     |         |                                     |         |                                      | Age(Ma,1σ) |                                     |     |                                     |     |
|---------------------------------|------|------|-----|--------|--------------------------------------|---------|-------------------------------------|---------|-------------------------------------|---------|--------------------------------------|------------|-------------------------------------|-----|-------------------------------------|-----|
|                                 | ppm  | ppm  | ppm | Th/U   | <sup>207</sup> Pb/ <sup>206</sup> Pb | 1σ      | <sup>207</sup> Pb/ <sup>235</sup> U | 1σ      | <sup>206</sup> Pb/ <sup>238</sup> U | 1σ      | <sup>207</sup> Pb/ <sup>206</sup> Pb | 1σ         | <sup>207</sup> Pb/ <sup>235</sup> U | 1σ  | <sup>206</sup> Pb/ <sup>238</sup> U | 1σ  |
| LA-ICP-MS                       |      |      |     |        |                                      |         |                                     |         |                                     |         |                                      |            |                                     |     |                                     |     |
| North                           |      |      |     |        |                                      |         |                                     |         |                                     |         |                                      |            |                                     |     |                                     |     |
| PM4-5 (29°58'52.2" 84°59'25.4") |      |      |     |        |                                      |         |                                     |         |                                     |         |                                      |            |                                     |     |                                     |     |
| PM4-5-01                        | 365  | 530  | 5   | 0.69   | 0.06080                              | 0.00263 | 0.06424                             | 0.00264 | 0.00766                             | 0.00018 | 632                                  | 91         | 63.2                                | 2.5 | 49.2                                | 1.1 |
| PM4-5-02                        | 997  | 980  | 9   | 1.02   | 0.04730                              | 0.00213 | 0.04934                             | 0.00214 | 0.00757                             | 0.00017 | 64                                   | 105        | 48.9                                | 2.1 | 48.6                                | 1.1 |
| PM4-5-03                        | 1998 | 1377 | 15  | 1.45   | 0.05719                              | 0.00176 | 0.05997                             | 0.00176 | 0.00761                             | 0.00016 | 498                                  | 67         | 59.1                                | 1.7 | 48.8                                | 1.0 |
| PM4-5-04                        | 608  | 1146 | 10  | 0.53   | 0.05347                              | 0.00242 | 0.05609                             | 0.00243 | 0.00761                             | 0.00018 | 349                                  | 99         | 55.4                                | 2.3 | 48.9                                | 1.1 |
| PM4-5-05                        | 573  | 562  | 5   | 1.02   | 0.04139                              | 0.00316 | 0.04466                             | 0.00331 | 0.00782                             | 0.00021 | 0                                    | 0          | 44.4                                | 3.2 | 50.2                                | 1.3 |
| PM4-5-06                        | 867  | 1730 | 15  | 0.50   | 0.05362                              | 0.00221 | 0.05829                             | 0.00229 | 0.00788                             | 0.00018 | 355                                  | 90         | 57.5                                | 2.2 | 50.6                                | 1.1 |
| PM4-5-07                        | 431  | 322  | 3   | 1.34   | 0.04718                              | 0.00557 | 0.05035                             | 0.00578 | 0.00774                             | 0.00026 | 58                                   | 260        | 49.9                                | 5.6 | 49.7                                | 1.7 |
| PM4-5-08                        | 479  | 495  | 5   | 0.97   | 0.04696                              | 0.00406 | 0.05128                             | 0.00428 | 0.00792                             | 0.00023 | 47                                   | 195        | 50.8                                | 4.1 | 50.8                                | 1.5 |
| PM4-5-09                        | 702  | 582  | 6   | 1.21   | 0.04711                              | 0.00374 | 0.04941                             | 0.00379 | 0.00761                             | 0.00021 | 54                                   | 180        | 49                                  | 3.7 | 48.8                                | 1.4 |
| PM4-5-10                        | 403  | 591  | 6   | 0.68   | 0.05876                              | 0.00362 | 0.06520                             | 0.00385 | 0.00805                             | 0.00021 | 558                                  | 129        | 64.1                                | 3.7 | 51.7                                | 1.4 |
| PM4-5-11                        | 279  | 643  | 5   | 0.43   | 0.04641                              | 0.00345 | 0.04872                             | 0.00352 | 0.00761                             | 0.00020 | 19                                   | 169        | 48.3                                | 3.4 | 48.9                                | 1.3 |
| PM4-5-12                        | 466  | 729  | 7   | 0.64   | 0.04857                              | 0.00313 | 0.05185                             | 0.00321 | 0.00774                             | 0.00020 | 127                                  | 145        | 51.3                                | 3.1 | 49.7                                | 1.3 |
| PM4-5-13                        | 741  | 948  | 9   | 0.78   | 0.04902                              | 0.00481 | 0.05329                             | 0.00500 | 0.00788                             | 0.00027 | 149                                  | 215        | 52.7                                | 4.8 | 50.6                                | 1.7 |
| PM4-5-14                        | 399  | 404  | 4   | 0.99   | 0.04462                              | 0.00385 | 0.04728                             | 0.00395 | 0.00768                             | 0.00022 | 0                                    | 122        | 46.9                                | 3.8 | 49.3                                | 1.4 |
| PM4-5-15                        | 494  | 850  | 7   | 0.58   | 0.05223                              | 0.00304 | 0.05600                             | 0.00312 | 0.00778                             | 0.00020 | 296                                  | 127        | 55.3                                | 3.0 | 49.9                                | 1.3 |
| PM4-5-16                        | 532  | 757  | 6   | 0.70   | 0.04599                              | 0.00340 | 0.04865                             | 0.00347 | 0.00767                             | 0.00021 | 0                                    | 166        | 48.2                                | 3.4 | 49.3                                | 1.3 |
| PM4-5-17                        | 665  | 644  | 6   | 1.03   | 0.04839                              | 0.00344 | 0.05241                             | 0.00359 | 0.00785                             | 0.00021 | 118                                  | 160        | 51.9                                | 3.5 | 50.4                                | 1.4 |
| PM2-63 (29°58'1" 84°39'27.7")   |      |      |     |        |                                      |         |                                     |         |                                     |         |                                      |            |                                     |     |                                     |     |
| PM2-63-01                       | 405  | 421  | 4   | 0.96   | 0.04697                              | 0.00429 | 0.05032                             | 0.00447 | 0.00777                             | 0.00018 | 48                                   | 205        | 49.9                                | 4.3 | 49.9                                | 1.2 |
| PM2-63-02                       | 392  | 418  | 4   | 0.94   | 0.04290                              | 0.00451 | 0.04599                             | 0.00472 | 0.00777                             | 0.00020 | 0                                    | 69         | 45.7                                | 4.6 | 49.9                                | 1.3 |
| PM2-63-03                       | 272  | 286  | 3   | 0.95   | 0.04663                              | 0.00489 | 0.05147                             | 0.00526 | 0.00800                             | 0.00021 | 30                                   | 234        | 51                                  | 5.1 | 51.4                                | 1.3 |

Table S1 (Continued)

| Sample spots                    | Th   | U    | Pb* | Ratios |                                      |         |                                     |         |                                     |         |                                      | Age(Ma,1σ) |                                     |     |                                     |     |  |
|---------------------------------|------|------|-----|--------|--------------------------------------|---------|-------------------------------------|---------|-------------------------------------|---------|--------------------------------------|------------|-------------------------------------|-----|-------------------------------------|-----|--|
|                                 | ppm  | ppm  | ppm | Th/U   | <sup>207</sup> Pb/ <sup>206</sup> Pb | 1σ      | <sup>207</sup> Pb/ <sup>235</sup> U | 1σ      | <sup>206</sup> Pb/ <sup>238</sup> U | 1σ      | <sup>207</sup> Pb/ <sup>206</sup> Pb | 1σ         | <sup>207</sup> Pb/ <sup>235</sup> U | 1σ  | <sup>206</sup> Pb/ <sup>238</sup> U | 1σ  |  |
| PM2-63-04                       | 1024 | 807  | 8   | 1.27   | 0.04823                              | 0.00278 | 0.05111                             | 0.00284 | 0.00768                             | 0.00014 | 110                                  | 131        | 50.6                                | 2.7 | 49.3                                | 0.9 |  |
| PM2-63-05                       | 493  | 458  | 5   | 1.08   | 0.04934                              | 0.00412 | 0.05320                             | 0.00427 | 0.00782                             | 0.00020 | 164                                  | 184        | 52.6                                | 4.1 | 50.2                                | 1.3 |  |
| PM2-63-06                       | 169  | 652  | 5   | 0.26   | 0.05001                              | 0.00305 | 0.05320                             | 0.00312 | 0.00771                             | 0.00015 | 196                                  | 136        | 52.6                                | 3.0 | 49.5                                | 1.0 |  |
| PM2-63-07                       | 446  | 459  | 5   | 0.97   | 0.05274                              | 0.00375 | 0.05561                             | 0.00380 | 0.00765                             | 0.00017 | 318                                  | 153        | 55                                  | 3.7 | 49.1                                | 1.1 |  |
| PM2-63-08                       | 734  | 1642 | 14  | 0.45   | 0.04930                              | 0.00194 | 0.05335                             | 0.00202 | 0.00785                             | 0.00012 | 162                                  | 90         | 52.8                                | 1.9 | 50.4                                | 0.7 |  |
| PM2-63-09                       | 416  | 500  | 5   | 0.83   | 0.04712                              | 0.00367 | 0.05131                             | 0.00387 | 0.00790                             | 0.00017 | 55                                   | 176        | 50.8                                | 3.7 | 50.7                                | 1.1 |  |
| PM2-63-10                       | 484  | 451  | 4   | 1.07   | 0.04366                              | 0.00389 | 0.04665                             | 0.00404 | 0.00775                             | 0.00018 | 0                                    | 76         | 46.3                                | 3.9 | 49.8                                | 1.1 |  |
| PM2-63-11                       | 399  | 406  | 4   | 0.98   | 0.04950                              | 0.00436 | 0.05357                             | 0.00459 | 0.00785                             | 0.00018 | 172                                  | 194        | 53                                  | 4.4 | 50.4                                | 1.2 |  |
| PM2-63-12                       | 318  | 629  | 6   | 0.51   | 0.04590                              | 0.00291 | 0.05084                             | 0.00311 | 0.00803                             | 0.00016 | 0                                    | 139        | 50.4                                | 3.0 | 51.6                                | 1.0 |  |
| PM2-63-13                       | 290  | 456  | 4   | 0.64   | 0.04646                              | 0.00353 | 0.05216                             | 0.00384 | 0.00814                             | 0.00017 | 21                                   | 173        | 51.6                                | 3.7 | 52.3                                | 1.1 |  |
| PM2-63-14                       | 373  | 448  | 4   | 0.83   | 0.05669                              | 0.00410 | 0.06213                             | 0.00431 | 0.00795                             | 0.00018 | 479                                  | 153        | 61.2                                | 4.1 | 51                                  | 1.2 |  |
| PM2-63-15                       | 192  | 213  | 2   | 0.90   | 0.04411                              | 0.00634 | 0.04766                             | 0.00671 | 0.00784                             | 0.00025 | 0                                    | 215        | 47.3                                | 6.5 | 50.3                                | 1.6 |  |
| PM3-40 (29°58'1.6" 84°47'43.9") |      |      |     |        |                                      |         |                                     |         |                                     |         |                                      |            |                                     |     |                                     |     |  |
| PM3-40-01                       | 1844 | 1281 | 15  | 1.44   | 0.04710                              | 0.00195 | 0.04661                             | 0.00186 | 0.00718                             | 0.00010 | 54                                   | 97         | 46.3                                | 1.8 | 46.1                                | 0.7 |  |
| PM3-40-02                       | 1217 | 586  | 7   | 2.08   | 0.05049                              | 0.00352 | 0.04993                             | 0.00336 | 0.00717                             | 0.00015 | 218                                  | 154        | 49.5                                | 3.3 | 46.1                                | 1.0 |  |
| PM3-40-03                       | 681  | 2856 | 22  | 0.24   | 0.04604                              | 0.00140 | 0.04652                             | 0.00135 | 0.00733                             | 0.00009 | 0                                    | 71         | 46.2                                | 1.3 | 47.1                                | 0.6 |  |
| PM3-40-04                       | 568  | 698  | 7   | 0.81   | 0.05022                              | 0.00274 | 0.05136                             | 0.00270 | 0.00742                             | 0.00013 | 205                                  | 122        | 50.9                                | 2.6 | 47.6                                | 0.8 |  |
| PM3-40-05                       | 560  | 628  | 7   | 0.89   | 0.05124                              | 0.00305 | 0.05026                             | 0.00286 | 0.00711                             | 0.00014 | 251                                  | 131        | 49.8                                | 2.8 | 45.7                                | 0.9 |  |
| PM3-40-06                       | 705  | 1096 | 10  | 0.64   | 0.05487                              | 0.00269 | 0.05503                             | 0.00258 | 0.00727                             | 0.00013 | 407                                  | 106        | 54.4                                | 2.5 | 46.7                                | 0.8 |  |
| PM3-40-07                       | 1200 | 1403 | 14  | 0.86   | 0.04904                              | 0.00206 | 0.04919                             | 0.00198 | 0.00727                             | 0.00011 | 150                                  | 96         | 48.8                                | 1.9 | 46.7                                | 0.7 |  |
| PM3-40-08                       | 584  | 904  | 8   | 0.65   | 0.04734                              | 0.00220 | 0.04823                             | 0.00216 | 0.00739                             | 0.00011 | 66                                   | 108        | 47.8                                | 2.1 | 47.5                                | 0.7 |  |
| PM3-40-09                       | 453  | 795  | 8   | 0.57   | 0.04949                              | 0.00311 | 0.04817                             | 0.00291 | 0.00706                             | 0.00014 | 171                                  | 141        | 47.8                                | 2.8 | 45.3                                | 0.9 |  |
| PM3-40-10                       | 1741 | 1088 | 13  | 1.60   | 0.05371                              | 0.00289 | 0.05353                             | 0.00276 | 0.00723                             | 0.00013 | 359                                  | 116        | 52.9                                | 2.7 | 46.4                                | 0.8 |  |
| PM3-40-11                       | 1290 | 1906 | 18  | 0.68   | 0.04697                              | 0.00156 | 0.04785                             | 0.00153 | 0.00739                             | 0.00010 | 48                                   | 78         | 47.5                                | 1.5 | 47.5                                | 0.6 |  |

Table S1 (Continued)

| Sample spots                     | Th   | U    | Pb* | Ratios |                                      |         |                                     |         |                                     |         |                                      | Age(Ma,1σ) |                                     |     |                                     |     |  |
|----------------------------------|------|------|-----|--------|--------------------------------------|---------|-------------------------------------|---------|-------------------------------------|---------|--------------------------------------|------------|-------------------------------------|-----|-------------------------------------|-----|--|
|                                  | ppm  | ppm  | ppm | Th/U   | <sup>207</sup> Pb/ <sup>206</sup> Pb | 1σ      | <sup>207</sup> Pb/ <sup>235</sup> U | 1σ      | <sup>206</sup> Pb/ <sup>238</sup> U | 1σ      | <sup>207</sup> Pb/ <sup>206</sup> Pb | 1σ         | <sup>207</sup> Pb/ <sup>235</sup> U | 1σ  | <sup>206</sup> Pb/ <sup>238</sup> U | 1σ  |  |
| PM3-40-12                        | 647  | 1039 | 9   | 0.62   | 0.05346                              | 0.00285 | 0.05330                             | 0.00272 | 0.00723                             | 0.00013 | 348                                  | 116        | 52.7                                | 2.6 | 46.4                                | 0.8 |  |
| PM3-40-13                        | 782  | 874  | 8   | 0.89   | 0.05485                              | 0.00291 | 0.05553                             | 0.00283 | 0.00734                             | 0.00013 | 406                                  | 114        | 54.9                                | 2.7 | 47.2                                | 0.8 |  |
| PM3-40-14                        | 5592 | 2646 | 30  | 2.11   | 0.05083                              | 0.00153 | 0.05034                             | 0.00145 | 0.00718                             | 0.00009 | 233                                  | 68         | 49.9                                | 1.4 | 46.1                                | 0.6 |  |
| PM3-40-15                        | 1247 | 1335 | 13  | 0.93   | 0.04733                              | 0.00238 | 0.04678                             | 0.00226 | 0.00717                             | 0.00012 | 65                                   | 116        | 46.4                                | 2.2 | 46                                  | 0.8 |  |
| PM8-35 (29°51'42.9" 84°33'57.2") |      |      |     |        |                                      |         |                                     |         |                                     |         |                                      |            |                                     |     |                                     |     |  |
| PM8-35-01                        | 591  | 793  | 7   | 0.74   | 0.05204                              | 0.00269 | 0.05396                             | 0.00267 | 0.00752                             | 0.00013 | 287                                  | 114        | 53.4                                | 2.6 | 48.3                                | 0.9 |  |
| PM8-35-02                        | 2676 | 1341 | 15  | 2.00   | 0.04775                              | 0.00273 | 0.04867                             | 0.00268 | 0.00739                             | 0.00013 | 86                                   | 131        | 48.3                                | 2.6 | 47.5                                | 0.9 |  |
| PM8-35-03                        | 132  | 1232 | 9   | 0.11   | 0.05089                              | 0.00200 | 0.05218                             | 0.00197 | 0.00744                             | 0.00011 | 236                                  | 88         | 51.6                                | 1.9 | 47.8                                | 0.7 |  |
| PM8-35-04                        | 234  | 522  | 5   | 0.45   | 0.04769                              | 0.00356 | 0.04890                             | 0.00351 | 0.00744                             | 0.00017 | 83                                   | 169        | 48.5                                | 3.4 | 47.8                                | 1.1 |  |
| PM8-35-05                        | 308  | 309  | 3   | 1.00   | 0.05205                              | 0.00541 | 0.05271                             | 0.00535 | 0.00735                             | 0.00018 | 288                                  | 221        | 52.2                                | 5.2 | 47.2                                | 1.2 |  |
| PM8-35-06                        | 1203 | 1495 | 17  | 0.80   | 0.04979                              | 0.00294 | 0.05077                             | 0.00287 | 0.00740                             | 0.00014 | 185                                  | 132        | 50.3                                | 2.8 | 47.5                                | 0.9 |  |
| PM8-35-07                        | 431  | 767  | 7   | 0.56   | 0.05220                              | 0.00347 | 0.05272                             | 0.00336 | 0.00733                             | 0.00016 | 294                                  | 145        | 52.2                                | 3.2 | 47.1                                | 1.0 |  |
| PM8-35-08                        | 575  | 812  | 8   | 0.71   | 0.04663                              | 0.00288 | 0.04832                             | 0.00289 | 0.00752                             | 0.00014 | 30                                   | 142        | 47.9                                | 2.8 | 48.3                                | 0.9 |  |
| PM8-35-09                        | 508  | 957  | 8   | 0.53   | 0.04677                              | 0.00239 | 0.04642                             | 0.00229 | 0.00720                             | 0.00012 | 37                                   | 118        | 46.1                                | 2.2 | 46.3                                | 0.8 |  |
| PM8-35-10                        | 1181 | 1158 | 11  | 1.02   | 0.05526                              | 0.00232 | 0.05582                             | 0.00224 | 0.00733                             | 0.00011 | 423                                  | 91         | 55.1                                | 2.2 | 47.1                                | 0.7 |  |
| PM8-35-11                        | 464  | 686  | 6   | 0.68   | 0.05308                              | 0.00296 | 0.05362                             | 0.00286 | 0.00733                             | 0.00014 | 332                                  | 122        | 53                                  | 2.8 | 47.1                                | 0.9 |  |
| PM8-35-12                        | 922  | 1182 | 11  | 0.78   | 0.04962                              | 0.00218 | 0.05053                             | 0.00213 | 0.00739                             | 0.00011 | 177                                  | 99         | 50.1                                | 2.1 | 47.4                                | 0.7 |  |
| PM8-35-13                        | 522  | 857  | 7   | 0.61   | 0.05043                              | 0.00248 | 0.05026                             | 0.00237 | 0.00723                             | 0.00012 | 215                                  | 110        | 49.8                                | 2.3 | 46.4                                | 0.8 |  |
| PM8-35-14                        | 656  | 1010 | 9   | 0.65   | 0.04662                              | 0.00219 | 0.04737                             | 0.00214 | 0.00737                             | 0.00012 | 30                                   | 109        | 47                                  | 2.1 | 47.3                                | 0.8 |  |
| PM8-35-15                        | 734  | 1059 | 9   | 0.69   | 0.05173                              | 0.00288 | 0.05277                             | 0.00282 | 0.00740                             | 0.00014 | 273                                  | 123        | 52.2                                | 2.7 | 47.5                                | 0.9 |  |
| PM8-35-16                        | 670  | 644  | 6   | 1.04   | 0.04783                              | 0.00271 | 0.04847                             | 0.00264 | 0.00735                             | 0.00013 | 90                                   | 130        | 48.1                                | 2.6 | 47.2                                | 0.8 |  |

Table S1 (Continued)

| Sample spots        | Th           | U    | Pb*  | Ratios |                                      |         |                                     |         |                                     |         |                                      | Age(Ma,1σ) |                                     |     |                                     |     |
|---------------------|--------------|------|------|--------|--------------------------------------|---------|-------------------------------------|---------|-------------------------------------|---------|--------------------------------------|------------|-------------------------------------|-----|-------------------------------------|-----|
|                     | ppm          | ppm  | ppm  | Th/U   | <sup>207</sup> Pb/ <sup>206</sup> Pb | 1σ      | <sup>207</sup> Pb/ <sup>235</sup> U | 1σ      | <sup>206</sup> Pb/ <sup>238</sup> U | 1σ      | <sup>207</sup> Pb/ <sup>206</sup> Pb | 1σ         | <sup>207</sup> Pb/ <sup>235</sup> U | 1σ  | <sup>206</sup> Pb/ <sup>238</sup> U | 1σ  |
| South               |              |      |      |        |                                      |         |                                     |         |                                     |         |                                      |            |                                     |     |                                     |     |
| PM12-11(29°49'14.4" | 84°40'13.2") |      |      |        |                                      |         |                                     |         |                                     |         |                                      |            |                                     |     |                                     |     |
| PM12-11-01          | 1046         | 789  | 8.2  | 1.33   | 0.04904                              | 0.00269 | 0.05065                             | 0.00268 | 0.00749                             | 0.00013 | 150                                  | 124        | 50.2                                | 2.6 | 48.1                                | 0.9 |
| PM12-11-02          | 1146         | 939  | 9.3  | 1.22   | 0.05079                              | 0.00265 | 0.05141                             | 0.00257 | 0.00734                             | 0.00013 | 231                                  | 116        | 50.9                                | 2.5 | 47.1                                | 0.8 |
| PM12-11-03          | 514          | 814  | 7.9  | 0.63   | 0.05280                              | 0.00263 | 0.05628                             | 0.00270 | 0.00773                             | 0.00013 | 320                                  | 109        | 55.6                                | 2.6 | 49.6                                | 0.8 |
| PM12-11-04          | 427          | 624  | 6.6  | 0.68   | 0.05165                              | 0.00420 | 0.05348                             | 0.00416 | 0.00751                             | 0.00019 | 270                                  | 176        | 52.9                                | 4.0 | 48.2                                | 1.2 |
| PM12-11-05          | 501          | 522  | 4.6  | 0.96   | 0.04262                              | 0.00514 | 0.04352                             | 0.00510 | 0.00740                             | 0.00022 | 0                                    | 86         | 43.3                                | 5.0 | 47.6                                | 1.4 |
| PM12-11-06          | 614          | 791  | 6.7  | 0.78   | 0.05004                              | 0.00340 | 0.05217                             | 0.00340 | 0.00756                             | 0.00016 | 197                                  | 150        | 51.6                                | 3.3 | 48.6                                | 1.0 |
| PM12-11-07          | 857          | 934  | 9.3  | 0.92   | 0.07889                              | 0.00284 | 0.08215                             | 0.00277 | 0.00755                             | 0.00012 | 1170                                 | 70         | 80.2                                | 2.6 | 48.5                                | 0.8 |
| PM12-11-08          | 593          | 510  | 5.1  | 1.16   | 0.06545                              | 0.00401 | 0.06745                             | 0.00392 | 0.00747                             | 0.00016 | 789                                  | 124        | 66.3                                | 3.7 | 48                                  | 1.1 |
| PM12-11-09          | 828          | 964  | 9.3  | 0.86   | 0.05829                              | 0.00291 | 0.05920                             | 0.00282 | 0.00736                             | 0.00013 | 540                                  | 106        | 58.4                                | 2.7 | 47.3                                | 0.9 |
| PM12-11-10          | 908          | 1178 | 11.0 | 0.77   | 0.06502                              | 0.00320 | 0.06666                             | 0.00310 | 0.00743                             | 0.00014 | 775                                  | 100        | 65.5                                | 3.0 | 47.7                                | 0.9 |
| PM12-11-11          | 1104         | 3319 | 24.7 | 0.33   | 0.04877                              | 0.00197 | 0.04949                             | 0.00191 | 0.00736                             | 0.00011 | 137                                  | 92         | 49                                  | 1.9 | 47.3                                | 0.7 |
| PM12-11-12          | 995          | 978  | 9.8  | 1.02   | 0.04898                              | 0.00272 | 0.05055                             | 0.00269 | 0.00749                             | 0.00014 | 147                                  | 125        | 50.1                                | 2.6 | 48.1                                | 0.9 |
| PM12-11-13          | 307          | 515  | 4.4  | 0.60   | 0.04641                              | 0.00359 | 0.04862                             | 0.00364 | 0.00760                             | 0.00017 | 19                                   | 176        | 48.2                                | 3.5 | 48.8                                | 1.1 |
| PM12-11-14          | 604          | 698  | 7.3  | 0.86   | 0.06964                              | 0.00304 | 0.07297                             | 0.00302 | 0.00760                             | 0.00013 | 918                                  | 87         | 71.5                                | 2.9 | 48.8                                | 0.8 |
| PM12-11-15          | 479          | 973  | 8.0  | 0.49   | 0.04865                              | 0.00299 | 0.05043                             | 0.00297 | 0.00752                             | 0.00015 | 131                                  | 138        | 50                                  | 2.9 | 48.3                                | 1.0 |
| PM12-11-16          | 588          | 633  | 6.2  | 0.93   | 0.04963                              | 0.00464 | 0.05077                             | 0.00455 | 0.00742                             | 0.00021 | 178                                  | 204        | 50.3                                | 4.4 | 47.6                                | 1.4 |
| PM12-11-17          | 783          | 580  | 7.4  | 1.35   | 0.06573                              | 0.00468 | 0.06747                             | 0.00454 | 0.00744                             | 0.00019 | 798                                  | 143        | 66.3                                | 4.3 | 47.8                                | 1.2 |



Table S1 (Continued)

| Sample                           | Th    | U      | Pb*  | Th/U | f <sub>206</sub> *(%) | Ratio                               |       | Age(Ma,1σ)                          |         | Age(Ma,1σ)                           |       | Age(Ma,1σ)                          |      | Age(Ma,1σ)                          |     |
|----------------------------------|-------|--------|------|------|-----------------------|-------------------------------------|-------|-------------------------------------|---------|--------------------------------------|-------|-------------------------------------|------|-------------------------------------|-----|
| spots                            | ppm   | ppm    | ppm  |      |                       | <sup>207</sup> Pb/ <sup>235</sup> U | ±σ(%) | <sup>206</sup> Pb/ <sup>238</sup> U | ±σ(%)   | <sup>207</sup> Pb/ <sup>206</sup> Pb | ±σ    | <sup>207</sup> Pb/ <sup>235</sup> U | ±σ   | <sup>206</sup> Pb/ <sup>238</sup> U | ±σ  |
| SIMS                             |       |        |      |      |                       |                                     |       |                                     |         |                                      |       |                                     |      |                                     |     |
| North                            |       |        |      |      |                       |                                     |       |                                     |         |                                      |       |                                     |      |                                     |     |
| PM4-36 (29°56'6.2" 84°57'38.5")  |       |        |      |      |                       |                                     |       |                                     |         |                                      |       |                                     |      |                                     |     |
| PM4-36@01                        | 686.6 | 616.8  | 6.3  | 1.11 | 1.88                  | 0.04567                             | 6.93  | 0.00747                             | 1.52120 | -91.9                                | 158.0 | 45.3                                | 3.1  | 48.0                                | 0.7 |
| PM4-36@02                        | 513.5 | 525.7  | 5.3  | 0.98 | 1.59                  | 0.05183                             | 9.90  | 0.00752                             | 1.61613 | 193.0                                | 212.5 | 51.3                                | 5.0  | 48.3                                | 0.8 |
| PM4-36@03                        | 276.6 | 313.4  | 3.0  | 0.88 | 9.02                  | 0.05367                             | 29.09 | 0.00748                             | 1.84815 | 286.9                                | 555.2 | 53.1                                | 15.2 | 48.0                                | 0.9 |
| PM4-36@04                        | 663.8 | 924.3  | 8.6  | 0.72 | 3.57                  | 0.04471                             | 8.48  | 0.00749                             | 1.64242 | -149.1                               | 194.6 | 44.4                                | 3.7  | 48.1                                | 0.8 |
| PM4-36@05                        | 920.8 | 599.1  | 6.7  | 1.54 | 0.94                  | 0.04941                             | 4.54  | 0.00758                             | 1.79685 | 62.0                                 | 96.4  | 49.0                                | 2.2  | 48.7                                | 0.9 |
| PM4-36@06                        | 863.5 | 1068.1 | 10.1 | 0.81 | 0.89                  | 0.04966                             | 6.79  | 0.00747                             | 1.59094 | 108.1                                | 149.0 | 49.2                                | 3.3  | 48.0                                | 0.8 |
| PM4-36@07                        | 617.3 | 987.5  | 8.8  | 0.63 | 1.15                  | 0.04815                             | 6.99  | 0.00731                             | 1.66789 | 88.2                                 | 153.6 | 47.8                                | 3.3  | 46.9                                | 0.8 |
| PM4-36@08                        | 573.2 | 594.6  | 5.7  | 0.96 | 1.50                  | 0.04436                             | 11.38 | 0.00740                             | 1.61701 | -141.6                               | 258.0 | 44.1                                | 4.9  | 47.6                                | 0.8 |
| PM4-36@09                        | 198.3 | 240.7  | 2.3  | 0.82 | 3.10                  | 0.04536                             | 21.11 | 0.00738                             | 1.62401 | -78.7                                | 448.1 | 45.0                                | 9.3  | 47.4                                | 0.8 |
| PM4-36@10                        | 600.2 | 753.9  | 7.2  | 0.80 | 0.74                  | 0.05092                             | 4.92  | 0.00743                             | 1.55831 | 180.1                                | 105.4 | 50.4                                | 2.4  | 47.7                                | 0.7 |
| PM8-35 (29°51'42.9" 84°33'57.2") |       |        |      |      |                       |                                     |       |                                     |         |                                      |       |                                     |      |                                     |     |
| PM8-35@01                        | 195   | 1906   | 15   | 0.10 |                       | 0.04628                             | 1.89  | 0.0072                              | 1.51    | 30.8                                 | 27.1  | 45.9                                | 0.8  | 46.2                                | 0.7 |
| PM8-35@02                        | 1735  | 1821   | 18   | 0.95 | 0.31                  | 0.04600                             | 1.93  | 0.0072                              | 1.52    | 0.0                                  | 35.1  | 45.7                                | 0.9  | 46.4                                | 0.7 |
| PM8-35@03                        | 402   | 619    | 6    | 0.65 | 0.33                  | 0.04841                             | 2.84  | 0.0073                              | 1.54    | 94.1                                 | 55.5  | 48.0                                | 1.3  | 47.1                                | 0.7 |
| PM8-35@04                        | 1316  | 1699   | 16   | 0.77 |                       | 0.04758                             | 2.27  | 0.0074                              | 1.56    | 33.5                                 | 38.9  | 47.2                                | 1.0  | 47.5                                | 0.7 |
| PM8-35@05                        | 657   | 1970   | 17   | 0.33 | 0.32                  | 0.04697                             | 2.03  | 0.0074                              | 1.54    | -4.5                                 | 31.6  | 46.6                                | 0.9  | 47.6                                | 0.7 |
| PM8-35@06                        | 183   | 1107   | 9    | 0.16 | 0.00                  | 0.04716                             | 2.27  | 0.0075                              | 1.50    | -10.3                                | 40.6  | 46.8                                | 1.0  | 47.9                                | 0.7 |
| PM8-35@07                        | 1313  | 2029   | 19   | 0.65 | 0.18                  | 0.04812                             | 1.93  | 0.0075                              | 1.50    | 29.5                                 | 28.7  | 47.7                                | 0.9  | 48.1                                | 0.7 |
| PM8-35@08                        | 1010  | 1606   | 15   | 0.63 | 0.21                  | 0.04856                             | 2.09  | 0.0075                              | 1.58    | 37.3                                 | 32.4  | 48.1                                | 1.0  | 48.4                                | 0.8 |
| PM8-35@09                        | 1145  | 2237   | 20   | 0.51 | 0.46                  | 0.04851                             | 1.91  | 0.0075                              | 1.52    | 31.2                                 | 27.4  | 48.1                                | 0.9  | 48.4                                | 0.7 |
| PM8-35@10                        | 4102  | 2063   | 27   | 1.99 | 0.01                  | 0.04928                             | 1.94  | 0.0077                              | 1.53    | 0.0                                  | 37.5  | 48.8                                | 0.9  | 49.7                                | 0.8 |
| PM3-66 (29°56'48.9" 84°47'49.4") |       |        |      |      |                       |                                     |       |                                     |         |                                      |       |                                     |      |                                     |     |
| PM3-66@01                        | 363   | 482    | 5    | 0.75 | 0.21                  | 0.04655                             | 4.90  | 0.0074                              | 1.74    | -14.3                                | 107.1 | 46.2                                | 2.2  | 47.4                                | 0.8 |
| PM3-66@02                        | 828   | 567    | 6    | 1.46 | 0.36                  | 0.04718                             | 2.90  | 0.0074                              | 1.50    | 0.0                                  | 58.8  | 46.8                                | 1.3  | 47.7                                | 0.7 |
| PM3-66@04                        | 761   | 661    | 7    | 1.15 | 0.17                  | 0.04797                             | 2.93  | 0.0075                              | 1.55    | 22.0                                 | 58.6  | 47.6                                | 1.4  | 48.1                                | 0.7 |
| PM3-66@06                        | 635   | 611    | 6    | 1.04 | 0.30                  | 0.04888                             | 2.75  | 0.0076                              | 1.71    | 38.8                                 | 50.7  | 48.5                                | 1.3  | 48.7                                | 0.8 |
| PM3-66@07                        | 426   | 509    | 5    | 0.84 | 0.20                  | 0.04717                             | 3.53  | 0.0076                              | 1.54    | -49.6                                | 75.7  | 46.8                                | 1.6  | 48.7                                | 0.7 |
| PM3-66@08                        | 591   | 544    | 6    | 1.09 | 0.06                  | 0.04706                             | 3.30  | 0.0076                              | 1.51    | -55.8                                | 55.8  | 46.7                                | 1.5  | 48.7                                | 0.7 |
| PM3-66@09                        | 607   | 643    | 7    | 0.94 | 0.02                  | 0.04531                             | 3.75  | 0.0076                              | 1.50    | -162.2                               | 83.3  | 45.0                                | 1.7  | 49.0                                | 0.7 |
| PM3-66@10                        | 554   | 549    | 6    | 1.01 | 0.12                  | 0.04804                             | 3.23  | 0.0077                              | 1.59    | -31.3                                | 66.7  | 47.6                                | 1.5  | 49.2                                | 0.8 |

Table S1 (Continued)

| Sample spots                     | Th     | U      | Pb*  | Th/U | f <sub>206</sub> *(%) | Ratio                               |       |                                     |         | Age(Ma, 1σ)                          |       |                                     |     |                                     |     |  |
|----------------------------------|--------|--------|------|------|-----------------------|-------------------------------------|-------|-------------------------------------|---------|--------------------------------------|-------|-------------------------------------|-----|-------------------------------------|-----|--|
|                                  | ppm    | ppm    | ppm  |      |                       | <sup>207</sup> Pb/ <sup>235</sup> U | ±σ(%) | <sup>206</sup> Pb/ <sup>238</sup> U | ±σ(%)   | <sup>207</sup> Pb/ <sup>206</sup> Pb | ±σ    | <sup>207</sup> Pb/ <sup>235</sup> U | ±σ  | <sup>206</sup> Pb/ <sup>238</sup> U | ±σ  |  |
| South                            |        |        |      |      |                       |                                     |       |                                     |         |                                      |       |                                     |     |                                     |     |  |
| PM12-11(29°49'14.4" 84°40'13.2") |        |        |      |      |                       |                                     |       |                                     |         |                                      |       |                                     |     |                                     |     |  |
| PM12-11@01                       | 753.0  | 599.4  | 6.5  | 1.26 | 0.83                  | 0.04973                             | 6.56  | 0.00757                             | 1.57089 | 81.1                                 | 144.5 | 49.3                                | 3.2 | 48.6                                | 0.8 |  |
| PM12-11@02                       | 464.2  | 553.9  | 5.2  | 0.84 | 1.24                  | 0.04346                             | 7.85  | 0.00734                             | 1.67281 | -170.9                               | 170.9 | 43.2                                | 3.3 | 47.1                                | 0.8 |  |
| PM12-11@03                       | 196.3  | 447.2  | 3.8  | 0.44 | 1.73                  | 0.04657                             | 11.10 | 0.00737                             | 1.55513 | -10.7                                | 246.2 | 46.2                                | 5.0 | 47.3                                | 0.7 |  |
| PM12-11@04                       | 575.0  | 1062.8 | 9.4  | 0.54 | 1.14                  | 0.04358                             | 7.24  | 0.00743                             | 1.59997 | -193.0                               | 167.9 | 43.3                                | 3.1 | 47.7                                | 0.8 |  |
| PM12-11@05                       | 269.2  | 375.5  | 3.4  | 0.72 | 2.41                  | 0.04733                             | 12.88 | 0.00721                             | 1.59173 | 80.5                                 | 278.3 | 47.0                                | 5.9 | 46.3                                | 0.7 |  |
| PM12-11@06                       | 319.4  | 332.7  | 3.3  | 0.96 | 1.55                  | 0.04998                             | 11.03 | 0.00746                             | 1.56820 | 127.3                                | 238.6 | 49.5                                | 5.3 | 47.9                                | 0.7 |  |
| PM12-11@07                       | 698.0  | 966.4  | 8.5  | 0.72 | 1.13                  | 0.04265                             | 6.48  | 0.00716                             | 1.55464 | -155.3                               | 149.4 | 42.4                                | 2.7 | 46.0                                | 0.7 |  |
| PM12-11@08                       | 620.2  | 1351.5 | 11.1 | 0.46 | 0.80                  | 0.04407                             | 5.73  | 0.00713                             | 1.50607 | -64.0                                | 129.7 | 43.8                                | 2.5 | 45.8                                | 0.7 |  |
| PM12-11@09                       | 758.5  | 535.0  | 5.8  | 1.42 | 1.05                  | 0.04597                             | 4.97  | 0.00753                             | 1.80474 | -96.5                                | 96.5  | 45.6                                | 2.2 | 48.4                                | 0.9 |  |
| PM12-11@10                       | 1589.7 | 1589.2 | 15.7 | 1.00 | 0.32                  | 0.04903                             | 3.09  | 0.00741                             | 1.51717 | 99.0                                 | 62.5  | 48.6                                | 1.5 | 47.6                                | 0.7 |  |
| PM12-6(29°49'14.4" 84°40'13.2")  |        |        |      |      |                       |                                     |       |                                     |         |                                      |       |                                     |     |                                     |     |  |
| PM12-06@01                       | 715.2  | 818.6  | 8.3  | 0.87 | 0.00                  | 0.05029                             | 2.44  | 0.00763                             | 1.56774 | 88.2                                 | 43.6  | 49.8                                | 1.2 | 49.0                                | 0.8 |  |
| PM12-06@02                       | 568.1  | 587.5  | 6.2  | 0.97 | 0.12                  | 0.04999                             | 2.53  | 0.00770                             | 1.58580 | 53.9                                 | 46.3  | 49.5                                | 1.2 | 49.4                                | 0.8 |  |
| PM12-06@03                       | 129.9  | 166.1  | 1.6  | 0.78 | 0.01                  | 0.05339                             | 3.69  | 0.00751                             | 2.04951 | 267.2                                | 68.8  | 52.8                                | 1.9 | 48.2                                | 1.0 |  |
| PM12-06@04                       | 228.9  | 232.1  | 2.4  | 0.99 | 0.44                  | 0.04714                             | 4.28  | 0.00755                             | 1.50010 | -41.0                                | 94.6  | 46.8                                | 2.0 | 48.5                                | 0.7 |  |
| PM12-06@05                       | 303.3  | 247.2  | 2.7  | 1.23 | 0.04                  | 0.05080                             | 4.39  | 0.00768                             | 1.51386 | 97.6                                 | 94.6  | 50.3                                | 2.2 | 49.3                                | 0.7 |  |
| PM12-06@06                       | 532.1  | 528.9  | 5.5  | 1.01 | 0.15                  | 0.04921                             | 2.28  | 0.00767                             | 1.50480 | 26.4                                 | 40.7  | 48.8                                | 1.1 | 49.2                                | 0.7 |  |
| PM12-06@07                       | 248.6  | 337.7  | 3.2  | 0.74 | 0.21                  | 0.04814                             | 3.37  | 0.00749                             | 1.58285 | 30.1                                 | 69.9  | 47.7                                | 1.6 | 48.1                                | 0.8 |  |
| PM12-06@08                       | 647.2  | 963.5  | 9.4  | 0.67 | 0.02                  | 0.05218                             | 2.10  | 0.00775                             | 1.50016 | 140.9                                | 34.2  | 51.6                                | 1.1 | 49.7                                | 0.7 |  |
| PM12-06@09                       | 1836.8 | 1353.2 | 15.0 | 1.36 | 0.08                  | 0.04827                             | 2.00  | 0.00754                             | 1.55372 | 18.8                                 | 30.1  | 47.9                                | 0.9 | 48.5                                | 0.8 |  |
| PM12-06@10                       | 650.9  | 634.6  | 6.5  | 1.03 | 0.08                  | 0.04819                             | 2.59  | 0.00748                             | 1.54762 | 35.4                                 | 49.1  | 47.8                                | 1.2 | 48.0                                | 0.7 |  |
| PM12-06@11                       | 239.2  | 298.2  | 2.9  | 0.80 | 0.06                  | 0.05168                             | 2.90  | 0.00754                             | 1.50469 | 182.0                                | 56.8  | 51.2                                | 1.4 | 48.4                                | 0.7 |  |

Table S2 Major (wt%) and trace (ppm) element contents of the Lopu Range batholith

| Sample                             | PM3-3        | PM3-17       | PM3-40      | PM4-35      | PM4-36       | PM4-42       | PM4-57       | PM2-63       | PM4-64      |
|------------------------------------|--------------|--------------|-------------|-------------|--------------|--------------|--------------|--------------|-------------|
|                                    | 30°0'5.1"    | 29°59'21.8"  | 29°58'1.6"  | 29°56'6.9"  | 29°56'6.2"   | 29°56'2"     | 29°54'37.3"  | 29°54'11.4"  | 29°54'7.1"  |
| GPS                                | 84°48'0.4"   | 84°47'51.9"  | 84°47'43.9" | 84°57'44.1" | 84°57'38.5"  | 84°57'17.1"  | 84°56'57.9"  | 84°57'23.9"  | 84°57'28.4" |
| North                              |              |              |             |             |              |              |              |              |             |
| Type                               | Monzogranite | Monzogranite | Granite     | Granite     | Monzogranite | Monzogranite | Monzogranite | Monzogranite | Granite     |
| SiO <sub>2</sub>                   | 68.5         | 67.9         | 74.0        | 73.3        | 66.4         | 65.1         | 67.6         | 64.6         | 75.7        |
| TiO <sub>2</sub>                   | 0.51         | 0.57         | 0.29        | 0.41        | 0.65         | 0.63         | 0.54         | 0.74         | 0.23        |
| Al <sub>2</sub> O <sub>3</sub>     | 14.3         | 14.4         | 12.8        | 12.4        | 14.4         | 14.9         | 14.4         | 14.6         | 12.3        |
| Fe <sub>2</sub> O <sub>3</sub>     | 1.54         | 1.50         | 0.82        | 0.96        | 1.84         | 2.12         | 1.24         | 1.87         | 0.79        |
| FeO                                | 1.87         | 2.40         | 1.30        | 0.98        | 1.97         | 2.20         | 2.25         | 3.10         | 0.65        |
| MnO                                | 0.06         | 0.06         | 0.03        | 0.04        | 0.07         | 0.08         | 0.09         | 0.10         | 0.03        |
| MgO                                | 1.57         | 1.68         | 0.67        | 1.12        | 1.98         | 2.23         | 1.87         | 2.29         | 0.60        |
| CaO                                | 2.79         | 2.34         | 1.54        | 1.90        | 3.36         | 4.24         | 2.69         | 3.19         | 1.21        |
| Na <sub>2</sub> O                  | 3.19         | 3.16         | 2.85        | 2.83        | 3.05         | 3.12         | 3.23         | 2.89         | 2.91        |
| K <sub>2</sub> O                   | 4.62         | 4.71         | 4.87        | 5.08        | 4.95         | 4.10         | 4.77         | 4.60         | 4.73        |
| P <sub>2</sub> O <sub>5</sub>      | 0.16         | 0.19         | 0.08        | 0.17        | 0.24         | 0.23         | 0.21         | 0.24         | 0.09        |
| LOI                                | 0.52         | 0.62         | 0.52        | 0.55        | 0.64         | 0.57         | 0.71         | 1.11         | 0.54        |
| Total                              | 99.62        | 99.49        | 99.71       | 99.75       | 99.57        | 99.54        | 99.67        | 99.34        | 99.76       |
| A/CNK                              | 0.93         | 0.99         | 1.00        | 0.91        | 0.87         | 0.86         | 0.94         | 0.94         | 1.01        |
| Mg <sup>#</sup>                    | 46           | 44           | 37          | 52          | 49           | 49           | 49           | 46           | 44          |
| K <sub>2</sub> O/Na <sub>2</sub> O | 1.45         | 1.49         | 1.71        | 1.80        | 1.62         | 1.31         | 1.48         | 1.59         | 1.63        |
| Sc                                 | 7.20         | 8.44         | 3.69        | 6.66        | 9.75         | 11.6         | 8.43         | 10.4         | 3.49        |
| V                                  | 58.2         | 63.9         | 26.0        | 34.5        | 72.9         | 87.9         | 65.8         | 80.5         | 26.7        |
| Cr                                 | 45.0         | 53.0         | 32.3        | 29.6        | 32.0         | 42.6         | 44.9         | 45.9         | 14.1        |
| Co                                 | 11.9         | 16.4         | 12.1        | 17.1        | 18.7         | 23.3         | 18.5         | 15.3         | 22.1        |
| Ni                                 | 21.0         | 24.4         | 11.7        | 12.2        | 19.1         | 21.5         | 23.0         | 26.7         | 8.08        |
| Cu                                 | 17.7         | 14.2         | 14.2        | 7.95        | 5.80         | 15.2         | 6.60         | 7.58         | 4.84        |
| Zn                                 | 50.4         | 61.5         | 39.9        | 35.7        | 53.3         | 60.8         | 54.4         | 63.9         | 37.5        |
| Ga                                 | 17.8         | 19.5         | 16.0        | 17.8        | 19.1         | 19.1         | 19.4         | 18.8         | 16.3        |
| Ge                                 | 2.16         | 2.45         | 1.79        | 2.02        | 2.33         | 2.37         | 2.29         | 2.65         | 1.50        |
| Rb                                 | 347          | 413          | 349         | 389         | 351          | 221          | 460          | 329          | 478         |
| Sr                                 | 415          | 373          | 271         | 144         | 434          | 479          | 443          | 441          | 147         |
| Y                                  | 13.4         | 16.7         | 10.7        | 13.6        | 21.1         | 19.1         | 14.7         | 27.9         | 7.10        |
| Zr                                 | 162          | 208          | 118         | 160         | 154          | 147          | 168          | 191          | 96.3        |
| Nb                                 | 19.1         | 22.8         | 16.4        | 21.2        | 20.8         | 14.5         | 19.3         | 22.6         | 12.2        |
| Cs                                 | 17.3         | 27.5         | 20.7        | 24.2        | 18.0         | 13.5         | 22.5         | 14.9         | 17.4        |
| Ba                                 | 652          | 597          | 251         | 136         | 767          | 697          | 773          | 697          | 152         |
| La                                 | 59.7         | 64.0         | 55.8        | 57.5        | 64.4         | 54.9         | 49.0         | 64.8         | 43.1        |
| Ce                                 | 106          | 125          | 88.9        | 97.3        | 125          | 107          | 103          | 136          | 63.7        |
| Pr                                 | 11.4         | 12.9         | 8.74        | 9.81        | 14.2         | 12.2         | 11.5         | 16.2         | 5.66        |

|                      |      |      |      |      |      |      |      |      |      |
|----------------------|------|------|------|------|------|------|------|------|------|
| Nd                   | 38.7 | 43.8 | 27.5 | 31.9 | 49.1 | 43.5 | 40.0 | 57.1 | 17.2 |
| Sm                   | 5.93 | 6.84 | 4.02 | 4.83 | 7.99 | 7.44 | 6.30 | 9.80 | 2.51 |
| Eu                   | 1.06 | 1.08 | 0.65 | 0.68 | 1.30 | 1.30 | 1.06 | 1.39 | 0.39 |
| Gd                   | 4.31 | 5.04 | 3.10 | 3.80 | 6.01 | 5.83 | 4.53 | 7.42 | 2.01 |
| Tb                   | 0.52 | 0.62 | 0.37 | 0.47 | 0.77 | 0.73 | 0.56 | 1.01 | 0.23 |
| Dy                   | 2.67 | 3.30 | 1.94 | 2.49 | 4.08 | 3.82 | 2.90 | 5.36 | 1.22 |
| Ho                   | 0.52 | 0.66 | 0.39 | 0.50 | 0.81 | 0.75 | 0.56 | 1.07 | 0.25 |
| Er                   | 1.43 | 1.81 | 1.13 | 1.43 | 2.16 | 2.01 | 1.52 | 2.93 | 0.75 |
| Tm                   | 0.22 | 0.28 | 0.18 | 0.23 | 0.34 | 0.30 | 0.23 | 0.45 | 0.13 |
| Yb                   | 1.49 | 1.92 | 1.30 | 1.64 | 2.22 | 2.00 | 1.60 | 2.96 | 0.93 |
| Lu                   | 0.25 | 0.30 | 0.22 | 0.29 | 0.34 | 0.31 | 0.25 | 0.46 | 0.16 |
| Hf                   | 5.53 | 6.76 | 4.54 | 6.15 | 4.90 | 4.64 | 5.32 | 5.97 | 4.39 |
| Ta                   | 2.23 | 2.68 | 2.35 | 2.38 | 2.58 | 1.21 | 2.01 | 2.61 | 1.88 |
| Pb                   | 41.6 | 36.0 | 46.8 | 32.5 | 34.2 | 33.4 | 32.9 | 33.3 | 33.3 |
| Th                   | 49.9 | 73.0 | 51.9 | 52.9 | 54.0 | 27.4 | 45.9 | 61.6 | 42.4 |
| U                    | 6.32 | 11.1 | 8.74 | 26.2 | 11.5 | 5.46 | 7.28 | 12.5 | 66.1 |
| Sr/Y                 | 30.9 | 22.4 | 25.3 | 10.6 | 20.5 | 25.1 | 30.2 | 15.8 | 20.7 |
| Eu/Eu*               | 0.64 | 0.56 | 0.56 | 0.49 | 0.57 | 0.60 | 0.61 | 0.50 | 0.53 |
| (La/Yb) <sub>N</sub> | 28.8 | 23.9 | 30.8 | 25.1 | 20.8 | 19.7 | 22.0 | 15.7 | 33.1 |
| (Ho/Yb) <sub>N</sub> | 1.05 | 1.02 | 0.91 | 0.92 | 1.09 | 1.13 | 1.05 | 1.08 | 0.82 |
| T <sub>Zr</sub>      | 713  | 745  | 707  | 718  | 688  | 677  | 713  | 719  | 693  |

Table S2 (Continued)

| Sample                             | PM4-68      | PM4-69       | PM8-4       | PM8-7       | PM8-9       | PM8-31      | PM8-34      | PM8-35       | PM4-5        |
|------------------------------------|-------------|--------------|-------------|-------------|-------------|-------------|-------------|--------------|--------------|
|                                    | 29°53'48.2" | 29°53'40.7"  | 29°54'16.3" | 29°54'4.9"  | 29°53'53.9" | 29°52'2"    | 29°51'48.7" | 29°51'42.9"  | 29°58'52.2"  |
| GPS                                | 84°57'38.4" | 84°57'40.7"  | 84°32'21.5" | 84°32'26.9" | 84°32'31.2" | 84°33'55.9" | 84°33'57.9" | 84°33'57.2"  | 84°59'25.4"  |
| North                              |             |              |             |             |             |             |             |              |              |
| Type                               | Granite     | Monzogranite | Granite     | Granite     | Granite     | Granite     | Granite     | Monzogranite | Monzogranite |
| SiO <sub>2</sub>                   | 74.1        | 65.9         | 72.7        | 73.1        | 74.7        | 75.1        | 73.2        | 67.0         | 68.6         |
| TiO <sub>2</sub>                   | 0.28        | 0.67         | 0.19        | 0.21        | 0.20        | 0.15        | 0.19        | 0.58         | 0.57         |
| Al <sub>2</sub> O <sub>3</sub>     | 13.2        | 14.6         | 14.0        | 14.3        | 12.9        | 12.8        | 13.5        | 14.0         | 13.5         |
| Fe <sub>2</sub> O <sub>3</sub>     | 0.78        | 1.85         | 0.73        | 0.76        | 0.90        | 0.58        | 0.70        | 2.20         | 1.74         |
| FeO                                | 0.80        | 2.05         | 1.40        | 1.35        | 1.30        | 0.93        | 1.53        | 2.40         | 1.75         |
| MnO                                | 0.04        | 0.07         | 0.04        | 0.05        | 0.05        | 0.02        | 0.03        | 0.08         | 0.08         |
| MgO                                | 0.78        | 2.05         | 0.42        | 0.26        | 0.24        | 0.22        | 0.40        | 1.77         | 1.84         |
| CaO                                | 1.49        | 3.73         | 1.30        | 0.89        | 0.89        | 0.93        | 1.36        | 3.10         | 3.11         |
| Na <sub>2</sub> O                  | 2.60        | 2.98         | 3.62        | 3.29        | 3.02        | 3.53        | 3.35        | 3.04         | 3.17         |
| K <sub>2</sub> O                   | 5.00        | 4.65         | 5.05        | 5.23        | 5.29        | 5.02        | 4.84        | 4.28         | 4.41         |
| P <sub>2</sub> O <sub>5</sub>      | 0.10        | 0.25         | 0.11        | 0.04        | 0.04        | 0.04        | 0.09        | 0.18         | 0.23         |
| LOI                                | 0.58        | 0.67         | 0.09        | 0.08        | 0.08        | 0.45        | 0.27        | 0.93         | 0.63         |
| Total                              | 99.75       | 99.54        | 99.60       | 99.59       | 99.63       | 99.73       | 99.48       | 99.56        | 99.67        |
| A/CNK                              | 1.06        | 0.88         | 1.01        | 1.13        | 1.05        | 0.99        | 1.02        | 0.92         | 0.86         |
| Mg <sup>#</sup>                    | 48          | 49           | 26          | 18          | 17          | 21          | 25          | 42           | 49           |
| K <sub>2</sub> O/Na <sub>2</sub> O | 1.92        | 1.56         | 1.40        | 1.59        | 1.75        | 1.42        | 1.44        | 1.41         | 1.39         |
| Sc                                 | 3.82        | 9.81         | 5.60        | 4.02        | 3.57        | 5.80        | 4.63        | 7.85         | 8.60         |
| V                                  | 26.6        | 79.6         | 15.9        | 12.1        | 11.9        | 8.50        | 13.3        | 59.1         | 66.4         |
| Cr                                 | 16.6        | 40.8         | 29.3        | 16.7        | 13.3        | 10.5        | 21.6        | 37.5         | 52.5         |
| Co                                 | 20.3        | 19.7         | 13.0        | 14.2        | 15.0        | 11.6        | 12.4        | 13.8         | 14.5         |
| Ni                                 | 8.37        | 20.7         | 8.52        | 5.22        | 5.42        | 2.98        | 4.43        | 24.2         | 25.9         |
| Cu                                 | 7.43        | 13.6         | 9.34        | 5.51        | 4.65        | 7.51        | 6.63        | 6.61         | 9.16         |
| Zn                                 | 44.7        | 122          | 32.9        | 29.4        | 36.3        | 14.9        | 35.7        | 39.9         | 69.6         |
| Ga                                 | 15.6        | 19.2         | 16.7        | 16.9        | 16.8        | 19.3        | 18.6        | 17.9         | 18.6         |
| Ge                                 | 1.52        | 2.51         | 1.79        | 1.78        | 1.78        | 1.76        | 1.75        | 2.12         | 2.39         |
| Rb                                 | 449         | 332          | 450         | 484         | 420         | 712         | 396         | 419          | 414          |
| Sr                                 | 221         | 434          | 111         | 69.1        | 84.8        | 63.6        | 142         | 423          | 379          |
| Y                                  | 9.30        | 19.6         | 33.5        | 6.71        | 14.5        | 17.6        | 10.4        | 15.2         | 14.4         |
| Zr                                 | 85.4        | 153          | 113         | 123         | 141         | 86.5        | 103         | 156          | 168          |
| Nb                                 | 14.9        | 18.6         | 16.6        | 21.5        | 20.1        | 43.6        | 14.0        | 18.6         | 19.3         |
| Cs                                 | 22.4        | 19.0         | 17.3        | 23.0        | 17.6        | 23.4        | 26.4        | 38.8         | 27.8         |
| Ba                                 | 333         | 697          | 377         | 136         | 138         | 116         | 207         | 542          | 467          |
| La                                 | 46.1        | 58.4         | 31.7        | 81.4        | 101         | 40.0        | 107         | 55.8         | 47.3         |
| Ce                                 | 76.4        | 119          | 64.4        | 124         | 156         | 71.4        | 164         | 107          | 102          |

|                      |      |      |      |      |      |      |      |      |      |
|----------------------|------|------|------|------|------|------|------|------|------|
| Pr                   | 7.14 | 13.6 | 7.28 | 10.1 | 13.6 | 6.81 | 13.3 | 12.1 | 11.6 |
| Nd                   | 21.9 | 46.9 | 25.4 | 24.8 | 36.4 | 19.6 | 32.2 | 42.3 | 40.0 |
| Sm                   | 3.15 | 7.55 | 5.41 | 2.39 | 4.71 | 2.91 | 2.97 | 6.63 | 6.32 |
| Eu                   | 0.51 | 1.28 | 0.65 | 0.33 | 0.40 | 0.28 | 0.45 | 1.15 | 1.08 |
| Gd                   | 2.56 | 5.66 | 5.23 | 2.29 | 4.17 | 2.51 | 3.22 | 4.69 | 4.51 |
| Tb                   | 0.30 | 0.72 | 0.99 | 0.19 | 0.50 | 0.36 | 0.35 | 0.58 | 0.55 |
| Dy                   | 1.61 | 3.83 | 6.05 | 0.99 | 2.73 | 2.14 | 1.91 | 3.00 | 2.85 |
| Ho                   | 0.33 | 0.75 | 1.22 | 0.21 | 0.53 | 0.47 | 0.36 | 0.58 | 0.56 |
| Er                   | 0.98 | 2.04 | 3.31 | 0.72 | 1.49 | 1.50 | 0.97 | 1.57 | 1.49 |
| Tm                   | 0.17 | 0.31 | 0.49 | 0.15 | 0.24 | 0.28 | 0.15 | 0.24 | 0.23 |
| Yb                   | 1.19 | 2.04 | 3.03 | 1.33 | 1.61 | 2.23 | 0.99 | 1.57 | 1.56 |
| Lu                   | 0.21 | 0.32 | 0.46 | 0.27 | 0.25 | 0.40 | 0.16 | 0.25 | 0.25 |
| Hf                   | 3.41 | 4.81 | 3.99 | 4.74 | 5.03 | 4.23 | 3.83 | 4.94 | 5.39 |
| Ta                   | 1.83 | 2.03 | 2.55 | 3.41 | 3.11 | 8.06 | 1.69 | 2.05 | 2.07 |
| Pb                   | 38.0 | 55.6 | 67.3 | 58.4 | 55.0 | 40.1 | 59.4 | 35.4 | 32.3 |
| Th                   | 35.9 | 53.4 | 27.8 | 72.0 | 81.2 | 41.4 | 79.7 | 51.3 | 63.5 |
| U                    | 15.6 | 8.28 | 7.73 | 25.8 | 25.4 | 31.7 | 10.7 | 12.4 | 7.91 |
| Sr/Y                 | 23.8 | 22.1 | 3.32 | 10.3 | 5.83 | 3.60 | 13.6 | 27.8 | 26.3 |
| Eu/Eu*               | 0.55 | 0.60 | 0.37 | 0.43 | 0.28 | 0.32 | 0.44 | 0.63 | 0.62 |
| (La/Yb) <sub>N</sub> | 27.7 | 20.5 | 7.50 | 43.7 | 45.0 | 12.9 | 77.6 | 25.4 | 21.7 |
| (Ho/Yb) <sub>N</sub> | 0.83 | 1.10 | 1.21 | 0.48 | 1.00 | 0.63 | 1.10 | 1.11 | 1.07 |
| T <sub>Zr</sub>      | 686  | 687  | 700  | 726  | 733  | 677  | 695  | 702  | 700  |

---

Table S2 (Continued)

| Sample                             | PM3-66       | PM12-6       | PM12-11      |
|------------------------------------|--------------|--------------|--------------|
|                                    | 29°56'48.9"  | 29°49'14.4"  | 29°49'14.4"  |
| GPS                                | 84°47'49.4"  | 84°40'13.2"  | 84°40'13.2"  |
|                                    | North        | South        |              |
| Type                               | Monzogranite | Monzogranite | Monzogranite |
| SiO <sub>2</sub>                   | 64.4         | 64.9         | 64.3         |
| TiO <sub>2</sub>                   | 0.67         | 0.68         | 0.73         |
| Al <sub>2</sub> O <sub>3</sub>     | 14.9         | 14.9         | 15.1         |
| Fe <sub>2</sub> O <sub>3</sub>     | 2.52         | 1.06         | 1.05         |
| FeO                                | 2.40         | 3.73         | 3.48         |
| MnO                                | 0.08         | 0.08         | 0.07         |
| MgO                                | 2.21         | 2.00         | 2.16         |
| CaO                                | 3.67         | 3.65         | 3.94         |
| Na <sub>2</sub> O                  | 3.13         | 2.99         | 3.09         |
| K <sub>2</sub> O                   | 4.46         | 4.59         | 4.54         |
| P <sub>2</sub> O <sub>5</sub>      | 0.22         | 0.22         | 0.25         |
| LOI                                | 0.81         | 0.61         | 0.47         |
| Total                              | 99.49        | 99.40        | 99.18        |
| A/CNK                              | 0.90         | 0.90         | 0.88         |
| Mg <sup>#</sup>                    | 45           | 43           | 46           |
| K <sub>2</sub> O/Na <sub>2</sub> O | 1.42         | 1.54         | 1.47         |
| Sc                                 | 10.8         | 10.0         | 10.5         |
| V                                  | 83.0         | 77.8         | 83.6         |
| Cr                                 | 44.4         | 36.6         | 39.2         |
| Co                                 | 17.7         | 17.3         | 17.4         |
| Ni                                 | 23.3         | 22.5         | 24.3         |
| Cu                                 | 21.6         | 11.1         | 17.7         |
| Zn                                 | 87.2         | 65.3         | 65.4         |
| Ga                                 | 18.7         | 20.4         | 19.7         |
| Ge                                 | 2.45         | 2.42         | 2.49         |
| Rb                                 | 241          | 323          | 299          |
| Sr                                 | 450          | 494          | 505          |
| Y                                  | 20.9         | 19.6         | 19.3         |
| Zr                                 | 174          | 182          | 217          |
| Nb                                 | 14.9         | 18.6         | 19.2         |
| Cs                                 | 10.2         | 44.8         | 57.7         |
| Ba                                 | 737          | 711          | 768          |
| La                                 | 54.2         | 63.5         | 61.5         |
| Ce                                 | 108          | 126          | 122          |

|                      |      |      |      |
|----------------------|------|------|------|
| Pr                   | 12.3 | 14.3 | 14.0 |
| Nd                   | 43.6 | 49.6 | 49.6 |
| Sm                   | 7.38 | 8.17 | 7.94 |
| Eu                   | 1.28 | 1.36 | 1.36 |
| Gd                   | 5.74 | 5.69 | 5.83 |
| Tb                   | 0.77 | 0.72 | 0.72 |
| Dy                   | 4.15 | 3.86 | 3.76 |
| Ho                   | 0.83 | 0.73 | 0.74 |
| Er                   | 2.23 | 1.97 | 2.00 |
| Tm                   | 0.34 | 0.30 | 0.30 |
| Yb                   | 2.22 | 1.94 | 1.96 |
| Lu                   | 0.35 | 0.29 | 0.30 |
| Hf                   | 5.40 | 5.41 | 6.50 |
| Ta                   | 1.69 | 2.24 | 2.21 |
| Pb                   | 33.2 | 36.6 | 38.6 |
| Th                   | 35.9 | 51.4 | 47.9 |
| U                    | 2.89 | 6.86 | 7.72 |
| Sr/Y                 | 21.6 | 25.2 | 26.2 |
| Eu/Eu*               | 0.60 | 0.61 | 0.61 |
| (La/Yb) <sub>N</sub> | 17.5 | 23.5 | 22.5 |
| (Ho/Yb) <sub>N</sub> | 1.12 | 1.12 | 1.13 |
| T <sub>Zr</sub>      | 699  | 706  | 715  |

---

$Mg^{\#} = Mg^{2+} \times 100 / (Mg^{2+} + Fe^{2+})$ ;  $A/CNK = Al_2O_3 / (CaO + Na_2O + K_2O)$  molar;  $Eu/Eu^* = Eu_N / (Sm_N \times Gd_N)^{(1/2)}$ ,  $Eu_N$ ,  $Sm_N$  and  $Gd_N$ ,  $T_{Zr}$  were calculated by Boehnke et al., 2013 Chemical Geology (Boehnke, P., Watson, E.B., Trail, D., Harrison, T.M., Schmitt, A.K., 2013, Zircon saturation re-revisited. Chemical Geology, v. 351, p.324-334.)



---

## Text S2 References cited in Data 1 and 3

### REFERENCES CITED in Data 1

- Bouilhol, P., Schaltegger, U., Chiaradia, M., Ovtcharova, M., Stracke, A., Burg, J.-P., and Dawood, H., 2011, Timing of juvenile arc crust formation and evolution in the Sapat Complex (Kohistan–Pakistan): *Chemical Geology*, v. 280, p. 243–256, <https://doi.org/10.1016/j.chemgeo.2010.11.013>.
- Chen, L., Qin, K.Z., Li, G.M., Li, J.X., Xiao, B., Zhao, J.X., and Fan, X., 2015, Zircon U-Pb ages, geochemistry, and Sr-Nd-Pb-Hf isotopes of the Nuri intrusive rocks in the Gangdese area, southern Tibet: Constraints on timing, petrogenesis, and tectonic transformation: *Lithos*, v. 212, p. 379–396, <https://doi.org/10.1016/j.lithos.2014.11.014>.
- Chu, M.F., Chung, S.L., O'Reilly, S.Y., Pearson, N.J., Wu, F.Y., Li, X.H., Liu, D.Y., Ji, J.Q., Chu, C.H., and Lee, H.Y., 2011, India's hidden inputs to Tibetan orogeny revealed by Hf isotopes of Transhimalayan zircons and host rocks: *Earth and Planetary Science Letters*, v. 307, p. 479–486, <https://doi.org/10.1016/j.epsl.2011.05.020>.
- Chu, M.F., Chung, S.L., Song, B.A., Liu, D.Y., O'Reilly, S.Y., Pearson, N.J., Ji, J.Q., and Wen, D.J., 2006, Zircon U-Pb and Hf isotope constraints on the Mesozoic tectonics and crustal evolution of southern Tibet: *Geology*, v. 34, p. 745–748, <https://doi.org/10.1130/G22725.1>.
- Guan, Q., Zhu, D.-C., Zhao, Z.-D., Dong, G.-C., Zhang, L.-L., Li, X.-W., Liu, M., Mo, X.-X., Liu, Y.-S., and Yuan, H.-L., 2012, Crustal thickening prior to 38 Ma in southern Tibet: Evidence from lower crust-derived adakitic magmatism in the Gangdese Batholith: *Gondwana Research*, v. 21, p. 88–99, <https://doi.org/10.1016/j.gr.2011.07.004>.
- Guan, Q., Zhu, D.C., Zhao, Z.D., Dong, G.C., Mo, X.X., Liu, Y.S., Hu, Z.C., and Yuan, H.L., 2011, Zircon U-Pb chronology, geochemistry of the Late Cretaceous mafic magmatism in the southern Lhasa Terrane and its implications: *Yanshi Xuebao*, v. 27, p. 2083–2094.
- Guan, Q., Zhu, D.C., Zhao, Z.D., Zhang, L.L., Liu, M., Li, X.W., Yu, F., and Mo, X.X., 2010, Late Cretaceous adakites in the eastern segment of the Gangdese Belt, southern Tibet: Products of Neo-Tethyan ridge subduction?: *Yanshi Xuebao*, v. 26, p. 2165–2179.
- Guo, L., Zhang, H. F., Harris, N., Pan, F. B., and Xu, W. C., 2011, Origin and evolution of multi-stage felsic melts in eastern Gangdese belt: Constraints from U-Pb zircon dating and Hf isotopic composition. *Lithos*, v. 127, p. 54–67.
- Heuberger, S., Schaltegger, U., Burg, J.-P., Villa, I.M., Frank, M., Dawood, H., Hussain, S., and Zanchi, A., 2007, Age and isotopic constraints on magmatism along the Karakoram-Kohistan Suture Zone, NW Pakistan: evidence for subduction and continued convergence after India-Asia collision: *Swiss Journal of Geosciences*, v. 100, p. 85–107, <https://doi.org/10.1007/s00015-007-1203-7>.
- Ji, W.Q., Wu, F.Y., Chung, S.L., Li, J.X., and Liu, C.Z., 2009, Zircon U-Pb geochronology and Hf isotopic constraints on petrogenesis of the Gangdese batholith, southern Tibet: *Chemical Geology*, v. 262, p. 229–245, <https://doi.org/10.1016/j.chemgeo.2009.01.020>.

- 
- Ji, W.Q., Wu, F.Y., Chung, S.L., and Liu, C.Z., 2014, The Gangdese magmatic constraints on a latest Cretaceous lithospheric delamination of the Lhasa terrane, southern Tibet: *Lithos*, v. 210, p. 168–180, <https://doi.org/10.1016/j.lithos.2014.10.001>.
- Ji, W.Q., Wu, F.Y., Liu, C.Z., and Chung, S.L., 2012, Early Eocene crustal thickening in southern Tibet: New age and geochemical constraints from the Gangdese batholith: *Journal of Asian Earth Sciences*, v. 53, p. 82–95, <https://doi.org/10.1016/j.jseaes.2011.08.020>.
- Jia, L.L., 2014, Regional variation of geochemical characteristics and tectonic implication of the Early Eocene basic rocks in southern Tibet: Master thesis, China University of Geoscience (Beijing), p. 1–60.
- Jiang, Z.Q., Wang, Q., Li, Z.X., Wyman, D.A., Tang, G.J., Jia, X.H., and Yang, Y.H., 2012, Late Cretaceous (ca. 90 Ma) adakitic intrusive rocks in the Kelu area, Gangdese Belt (southern Tibet): Slab melting and implications for Cu-Au mineralization: *Journal of Asian Earth Sciences*, v. 53, p. 67–81, <https://doi.org/10.1016/j.jseaes.2012.02.010>.
- Jiang, Z.Q., Wang, Q., Wyman, D.A., Li, Z.X., Yang, J.H., Shi, X.B., Ma, L., Tang, G.J., Gou, G.N., Jia, X.H., and Guo, H.F., 2014, Transition from oceanic to continental lithosphere subduction in southern Tibet: Evidence from the Late Cretaceous–Early Oligocene (similar to 91–30 Ma) intrusive rocks in the Chanang-Zedong area, southern Gangdese: *Lithos*, v. 196, p. 213–231, <https://doi.org/10.1016/j.lithos.2014.03.001>.
- Liu, A., Zhu, D., Wang, Q., Zhang, L., Li, S., Zhang, L., and Zhao, Z., 2015, LA-ICP-MS zircon U-Pb age and origin of the Linzizong volcanic rocks from Milashan, southern Tibet: *Geological Bulletin of China*, v. 34, p. 826–833.
- Liu, Z.-C., Ding, L., Zhang, L.-Y., Wang, C., Qiu, Z.-L., Wang, J.-G., Shen, X.-L., and Deng, X.-Q., 2018, Sequence and petrogenesis of the Jurassic volcanic rocks (Yeba Formation) in the Gangdese arc, southern Tibet: Implications for the Neo-Tethyan subduction: *Lithos*, v. 312–313, p. 72–88, <https://doi.org/10.1016/j.lithos.2018.04.026>.
- Liu, F., 2012, Cenozoic multistage adakitic magmatism and tectonic significance of the southeastern segment of the Gangdese belt, Tibetan Plateau: Master thesis, China University of Geosciences (Wuhan), p. 1–57.
- Liu, Z.C., Wu, F.Y., Ji, W.Q., Wang, J.G., and Liu, C.Z., 2014, Petrogenesis of the Ramba leucogranite in the Tethyan Himalaya and constraints on the channel flow model: *Lithos*, v. 208, p. 118–136, <https://doi.org/10.1016/j.lithos.2014.08.022>.
- Ma, L., Wang, B.D., Jiang, Z.Q., Wang, Q., Li, Z.X., Wyman, D.A., Zhao, S.R., Yang, J.H., Gou, G.N., and Guo, H.F., 2014, Petrogenesis of the Early Eocene adakitic rocks in the Napuri area, southern Lhasa: Partial melting of thickened lower crust during slab break-off and implications for crustal thickening in southern Tibet: *Lithos*, v. 196, p. 321–338, <https://doi.org/10.1016/j.lithos.2014.02.011>.
- Ma, L., Wang, Q., Li, Z.X., Wyman, D.A., Jiang, Z.Q., Yang, J.H., Gou, G.N., and Guo, H.F., 2013a, Early Late Cretaceous (ca. 93 Ma) norites and hornblendites in the Milin area, eastern Gangdese: Lithosphere–asthenosphere interaction during slab roll-back and an insight into early Late Cretaceous (ca. 100–80 Ma) magmatic “flare-up” in southern Lhasa (Tibet): *Lithos*, v. 172, p. 17–30, <https://doi.org/10.1016/j.lithos.2013.03.007>.

- 
- Ma, L., Wang, Q., Wyman, D.A., Jiang, Z.Q., Yang, J.H., Li, Q.L., Gou, G.N., and Guo, H.F., 2013b, Late Cretaceous crustal growth in the Gangdese area, southern Tibet: Petrological and Sr-Nd-Hf-O isotopic evidence from Zhengga diorite-gabbro: *Chemical Geology*, v. 349, p. 54–70, <https://doi.org/10.1016/j.chemgeo.2013.04.005>.
- Ma, L., Wang, Q., Wyman, D.A., Li, Z.X., Jiang, Z.Q., Yang, J.H., Gou, G.N., and Guo, H.F., 2013c, Late Cretaceous (100–89 Ma) magnesian charnockites with adakitite affinities in the Milin area, eastern Gangdese: Partial melting of subducted oceanic crust and implications for crustal growth in southern Tibet: *Lithos*, v. 175, p. 315–332, <https://doi.org/10.1016/j.lithos.2013.04.006>.
- Ravikant, V., Wu, F.Y., and Ji, W.Q., 2009, Zircon U-Pb and Hf isotopic constraints on petrogenesis of the Cretaceous-Tertiary granites in eastern Karakoram and Ladakh, India: *Lithos*, v. 110, p. 153–166, <https://doi.org/10.1016/j.lithos.2008.12.013>.
- Ran, M.-l., Kang, Z.-q., Xu, J.-f., Yang, F., Jiang, Z.-q., Li, Q., Wei, N.-s., Wei, T.-w., and Liu, D., 2019, Evolution of the northward subduction of the Neo-Tethys: Implications of geochemistry of Cretaceous arc volcanics in Qinghai-Tibetan Plateau: *Palaeogeography, Palaeoclimatology, Palaeoecology*, v. 515, p. 83–94, <https://doi.org/10.1016/j.palaeo.2017.12.043>.
- Schaltegger, U., Zeilinger, G., Frank, M., and Burg, J.-P., 2002, Multiple mantle sources during island arc magmatism: U-Pb and Hf isotopic evidence from the Kohistan arc complex, Pakistan: *Terra Nova*, v. 14, p. 461–468, <https://doi.org/10.1046/j.1365-3121.2002.00432.x>.
- Wang, R., Richards, J.P., Hou, Z.Q., An, F., and Creaser, R.A., 2015, Zircon U-Pb age and Sr-Nd-Hf-O isotope geochemistry of the Paleocene-Eocene igneous rocks in western Gangdese: Evidence for the timing of Neo-Tethyan slab breakoff: *Lithos*, v. 224, p. 179–194, <https://doi.org/10.1016/j.lithos.2015.03.003>.
- Wu, F. Y., Ji, W. Q., Liu, C. Z., and Chung, S. L., 2010, Detrital zircon U-Pb and Hf isotopic data from the Xigaze fore-arc basin: Constraints on Transhimalayan magmatic evolution in southern Tibet. *Chemical Geology*, v. 271, p. 13–25.
- Xu, W.C., 2010, Spatial variation of zircon U-Pb ages and Hf isotopic compositions of the Gangdese granitoids and its geologic implications: Ph.D thesis, China University of Geosciences (Wuhan), p. 1–172.
- Zhang, Z.M., Dong, X., Xiang, H., Liou, J.G., and Santosh, M., 2013, Building of the Deep Gangdese Arc, South Tibet: Paleocene Plutonism and Granulite-Facies Metamorphism: *Journal of Petrology*, v. 54, p. 2547–2580, <https://doi.org/10.1093/petrology/egt056>.
- Zheng, Y.C., Hou, Z.Q., Gong, Y.L., Liang, W., Sun, Q.Z., Zhang, S., Fu, Q., Huang, K.X., Li, Q.Y., and Li, W., 2014, Petrogenesis of Cretaceous adakite-like intrusions of the Gangdese Plutonic Belt, southern Tibet: Implications for mid-ocean ridge subduction and crustal growth: *Lithos*, v. 190, p. 240–263, <https://doi.org/10.1016/j.lithos.2013.12.013>.
- Zhou, L.M., Wang, R., Hou, Z.-q., Li, C., Zhao, H., Li, X.-W., and Qu, W.-J., 2018, Hot Paleocene-Eocene Gangdese arc: Growth of continental crust in southern Tibet: *Gondwana Research*, v. 62, p. 178–197, <https://doi.org/10.1016/j.gr.2017.12.011>.

---

Zhu, D.C., Zhao, Z.D., Niu, Y.L., Mo, X.X., Chung, S.L., Hou, Z.Q., Wang, L.Q., and Wu, F.Y., 2011, The Lhasa Terrane: Record of a microcontinent and its histories of drift and growth: *Earth and Planetary Science Letters*, v. 301, p. 241–255, <https://doi.org/10.1016/j.epsl.2010.11.005>.

### REFERENCES CITED in Data 3

- Chen, L., Qin, K.Z., Li, G.M., Li, J.X., Xiao, B., Zhao, J.X., and Fan, X., 2015, Zircon U-Pb ages, geochemistry, and Sr-Nd-Pb-Hf isotopes of the Nuri intrusive rocks in the Gangdese area, southern Tibet: Constraints on timing, petrogenesis, and tectonic transformation: *Lithos*, v. 212, p. 379–396, <https://doi.org/10.1016/j.lithos.2014.11.014>.
- Dong, G., Mo, X., Hao, Z., Zhu, D., Song, Y., and Wang, L., 2008, Gabbros from southern Gangdese: Implication for mass exchange between mantle and crust: *Yanshi Xuebao*, v. 24, p. 203–210.
- Gao, Y.F., Wei, R.H., Hou, Z.Q., Tian, S.H., and Zhao, R.S., 2008, Eocene high-MgO volcanism in southern Tibet: New constraints for mantle source characteristics and deep processes: *Lithos*, v. 105, p. 63–72, <https://doi.org/10.1016/j.lithos.2008.02.008>.
- Hou, Z.Q., Zheng, Y.C., Zeng, L.S., Gao, L.E., Huang, K.X., Li, W., Li, Q.Y., Fu, Q., Liang, W., and Sun, Q.Z., 2012, Eocene-Oligocene granitoids in southern Tibet: Constraints on crustal anatexis and tectonic evolution of the Himalayan orogeny: *Earth and Planetary Science Letters*, v. 349, p. 38–52, <https://doi.org/10.1016/j.epsl.2012.06.030>.
- Huang, Y., Zhao, Z.D., Zhang, F.Q., Zhu, D.C., Dung, G.C., Zhou, S., and Mo, X.X., 2010, Geochemistry and implication of the Gangdese batholiths from Renbu and Lhasa areas in southern Gangdese, Tibet: *Yanshi Xuebao*, v. 26, p. 3131–3142.
- Jiang, Z.Q., Wang, Q., Li, Z.X., Wyman, D.A., Tang, G.J., Jia, X.H., and Yang, Y.H., 2012, Late Cretaceous (ca. 90 Ma) adakitic intrusive rocks in the Kelu area, Gangdese Belt (southern Tibet): Slab melting and implications for Cu-Au mineralization: *Journal of Asian Earth Sciences*, v. 53, p. 67–81, <https://doi.org/10.1016/j.jseaes.2012.02.010>.
- Jiang, Z.Q., Wang, Q., Wyman, D.A., Li, Z.X., Yang, J.H., Shi, X.B., Ma, L., Tang, G.J., Gou, G.N., Jia, X.H., and Guo, H.F., 2014, Transition from oceanic to continental lithosphere subduction in southern Tibet: Evidence from the Late Cretaceous-Early Oligocene (similar to 91–30 Ma) intrusive rocks in the Chanang-Zedong area, southern Gangdese: *Lithos*, v. 196, p. 213–231, <https://doi.org/10.1016/j.lithos.2014.03.001>.
- Xie, K.J., Zeng, L.S., Liu, J., Gao, L.E., and Hue, G.Y., 2011, Timing and geochemistry of the Linzizong Group volcanic rocks in Sangsang area, Ngamring County, southern Tibet: *Geological Bulletin of China*, v. 30, p. 1339–1352.
- Lee, H.Y., Chung, S.L., Ji, J., Qian, Q., Gallet, S., Lo, C.H., Lee, T.Y., and Zhang, Q., 2012, Geochemical and Sr-Nd isotopic constraints on the genesis of the Cenozoic Linzizong volcanic successions, southern Tibet: *Journal of Asian Earth Sciences*, v. 53, p. 96–114, <https://doi.org/10.1016/j.jseaes.2011.08.019>.

- 
- Liu, Z.C., Wu, F.Y., Ji, W.Q., Wang, J.G., and Liu, C.Z., 2014, Petrogenesis of the Ramba leucogranite in the Tethyan Himalaya and constraints on the channel flow model: *Lithos*, v. 208, p. 118–136, <https://doi.org/10.1016/j.lithos.2014.08.022>.
- Liu, Z.-C., Ding, L., Zhang, L.-Y., Wang, C., Qiu, Z.-L., Wang, J.-G., Shen, X.-L., and Deng, X.-Q., 2018, Sequence and petrogenesis of the Jurassic volcanic rocks (Yeba Formation) in the Gangdese arc, southern Tibet: Implications for the Neo-Tethyan subduction: *Lithos*, v. 312–313, p. 72–88, <https://doi.org/10.1016/j.lithos.2018.04.026>.
- Ma, L., Wang, B.D., Jiang, Z.Q., Wang, Q., Li, Z.X., Wyman, D.A., Zhao, S.R., Yang, J.H., Gou, G.N., and Guo, H.F., 2014, Petrogenesis of the Early Eocene adakitic rocks in the Napuri area, southern Lhasa: Partial melting of thickened lower crust during slab break-off and implications for crustal thickening in southern Tibet: *Lithos*, v. 196, p. 321–338, <https://doi.org/10.1016/j.lithos.2014.02.011>.
- Ma, L., Wang, Q., Li, Z.X., Wyman, D.A., Jiang, Z.Q., Yang, J.H., Gou, G.N., and Guo, H.F., 2013a, Early Late Cretaceous (ca. 93 Ma) norites and hornblendites in the Milin area, eastern Gangdese: Lithosphere-asthenosphere interaction during slab roll-back and an insight into early Late Cretaceous (ca. 100–80 Ma) magmatic “flare-up” in southern Lhasa (Tibet): *Lithos*, v. 172, p. 17–30, <https://doi.org/10.1016/j.lithos.2013.03.007>.
- Ma, L., Wang, Q., Wyman, D.A., Jiang, Z.Q., Yang, J.H., Li, Q.L., Gou, G.N., and Guo, H.F., 2013b, Late Cretaceous crustal growth in the Gangdese area, southern Tibet: Petrological and Sr-Nd-Hf-O isotopic evidence from Zhengga diorite-gabbro: *Chemical Geology*, v. 349, p. 54–70, <https://doi.org/10.1016/j.chemgeo.2013.04.005>.
- Ma, L., Wang, Q., Wyman, D.A., Li, Z.X., Jiang, Z.Q., Yang, J.H., Gou, G.N., and Guo, H.F., 2013c, Late Cretaceous (100–89 Ma) magnesian charnockites with adakitic affinities in the Milin area, eastern Gangdese: Partial melting of subducted oceanic crust and implications for crustal growth in southern Tibet: *Lithos*, v. 175, p. 315–332, <https://doi.org/10.1016/j.lithos.2013.04.006>.
- Mo, X., Niu, Y., Dong, G., Zhao, Z., Hou, Z., Zhou, S., and Ke, S., 2008, Contribution of syncollisional felsic magmatism to continental crust growth: A case study of the Paleogene Linzizong volcanic Succession in southern Tibet: *Chemical Geology*, v. 250, p. 49–67, <https://doi.org/10.1016/j.chemgeo.2008.02.003>.
- Mo, X.X., Hou, Z.Q., Niu, Y.L., Dong, G.C., Qu, X.M., Zhao, Z.D., and Yang, Z.M., 2007, Mantle contributions to crustal thickening during continental collision: Evidence from Cenozoic igneous rocks in southern Tibet: *Lithos*, v. 96, p. 225–242, <https://doi.org/10.1016/j.lithos.2006.10.005>.
- Ran, M.-l., Kang, Z.-q., Xu, J.-f., Yang, F., Jiang, Z.-Q., Li, Q., Wei, N.-S., Wei, T.-W., and Liu, D., 2018, Evolution of the northward subduction of the Neo-Tethys: Implications of geochemistry of Cretaceous arc volcanics in Qinghai-Tibetan Plateau: *Palaeogeography, Palaeoclimatology, Palaeoecology*, v. 515, p. 83–94, <https://doi.org/10.1016/j.palaeo.2017.12.043>.
- Wang, R., Richards, J.P., Hou, Z.Q., An, F., and Creaser, R.A., 2015a, Zircon U-Pb age and Sr-Nd-Hf-O isotope geochemistry of the Paleocene-Eocene igneous rocks in western

- 
- Gangdese: Evidence for the timing of Neo-Tethyan slab breakoff: *Lithos*, v. 224, p. 179–194, <https://doi.org/10.1016/j.lithos.2015.03.003>.
- Wang, R., Richards, J.P., Zhou, L.-m., Hou, Z.-q., Stern, R.A., Creaser, R.A., and Zhu, J.-J., 2015b, The role of Indian and Tibetan lithosphere in spatial distribution of Cenozoic magmatism and porphyry Cu–Mo deposits in the Gangdese belt, southern Tibet: *Earth-Science Reviews*, v. 150, p. 68–94, <https://doi.org/10.1016/j.earscirev.2015.07.003>.
- Wen, D.R., Chung, S.L., Song, B., Iizuka, Y., Yang, H.J., Ji, J.Q., Liu, D.Y., and Gallet, S., 2008, Late Cretaceous Gangdese intrusions of adakitic geochemical characteristics, SE Tibet: Petrogenesis and tectonic implications: *Lithos*, v. 105, p. 1–11, <https://doi.org/10.1016/j.lithos.2008.02.005>.
- Yang, Z.M., Hou, Z.Q., Jiang, Y.F., Zhang, H.R., and Song, Y.C., 2011, Sr-Nd-Pb and zircon Hf isotopic constraints on petrogenesis of the Late Jurassic granitic porphyry at Qulong, Tibet: *Yanshi Xuebao*, v. 27, p. 2003–2010.
- Zeng, L.S., Gao, L.E., Xie, K.J., and Jing, L.Z., 2011, Mid-Eocene high Sr/Y granites in the Northern Himalayan Gneiss Domes: Melting thickened lower continental crust: *Earth and Planetary Science Letters*, v. 303, p. 251–266, <https://doi.org/10.1016/j.epsl.2011.01.005>.
- Zheng, Y.C., Hou, Z.Q., Gong, Y.L., Liang, W., Sun, Q.Z., Zhang, S., Fu, Q., Huang, K.X., Li, Q.Y., and Li, W., 2014, Petrogenesis of Cretaceous adakite-like intrusions of the Gangdese Plutonic Belt, southern Tibet: Implications for mid-ocean ridge subduction and crustal growth: *Lithos*, v. 190, p. 240–263, <https://doi.org/10.1016/j.lithos.2013.12.013>.
